# Supplementary material for: When to break the news and whose responsibility is it? A cross-sectional qualitative study of health professionals’ views regarding disclosure of BRCA genetic cancer risk
Source: PubMed Central journal article supplement — BMJ Open. 2020 Feb 25;10(2):e033127. doi: 10.1136/bmjopen-2019-033127 (PMC7045026; doi:10.1136/bmjopen-2019-033127), 2020-02-25
Supplement: bmjopen-2019-033127.draft_revisions.pdf [file bmjopen-2019-033127.draft_revisions.pdf]

# BMJ Open

BMJ Open is committed to open peer review. As part of this commitment we make the peer review history of every article we publish publicly available.

When an article is published we post the peer reviewers' comments and the authors' responses online. We also post the versions of the paper that were used during peer review. These are the versions that the peer review comments apply to.

The versions of the paper that follow are the versions that were submitted during the peer review process. They are not the versions of record or the final published versions. They should not be cited or distributed as the published version of this manuscript.

BMJ Open is an open access journal and the full, final, typeset and author-corrected version of record of the manuscript is available on our site with no access controls, subscription charges or pay-per-view fees (<http://bmjopen.bmj.com>).

If you have any questions on BMJ Open's open peer review process please email [info.bmjopen@bmj.com](mailto:info.bmjopen@bmj.com)

# BMJ Open

## When to break the news and whose responsibility is it? Genetic health professional focus groups on disclosure of BRCA genetic cancer risk

|                               |                                                                                                                                                                                                                                                                                                                                                                                                                                                                                                                                                                                                                                                                                                                                                                          |
|-------------------------------|--------------------------------------------------------------------------------------------------------------------------------------------------------------------------------------------------------------------------------------------------------------------------------------------------------------------------------------------------------------------------------------------------------------------------------------------------------------------------------------------------------------------------------------------------------------------------------------------------------------------------------------------------------------------------------------------------------------------------------------------------------------------------|
| Journal:                      | <i>BMJ Open</i>                                                                                                                                                                                                                                                                                                                                                                                                                                                                                                                                                                                                                                                                                                                                                          |
| Manuscript ID                 | bmjopen-2019-033127                                                                                                                                                                                                                                                                                                                                                                                                                                                                                                                                                                                                                                                                                                                                                      |
| Article Type:                 | Original research                                                                                                                                                                                                                                                                                                                                                                                                                                                                                                                                                                                                                                                                                                                                                        |
| Date Submitted by the Author: | 22-Jul-2019                                                                                                                                                                                                                                                                                                                                                                                                                                                                                                                                                                                                                                                                                                                                                              |
| Complete List of Authors:     | Young, Alison; The University of Sydney, The University of Sydney; Sydney Children's Hospital Randwick, Kids Cancer Centre<br>Butow, Phyllis; The University of Sydney<br>Tucker, Kathy; University of New South Wales, Prince of Wales Clinical School; Prince of Wales Hospital and Community Health Services, Prince of Wales Hereditary Cancer Centre<br>Wakefield, Claire; University of New South Wales, School of Women's and Children's Health; Sydney Children's Hospital Randwick, Kids Cancer Centre<br>Healey, Emma; Wollongong Hospital, Illawarra Cancer Care Centre<br>Williams, Rachel; Prince of Wales Hospital and Community Health Services, Prince of Wales Hereditary Cancer Centre; University of New South Wales, Prince of Wales Clinical School |
| Keywords:                     | duty to warn, genetic privacy, genetic testing, GENETICS, ethical issues, disclosure                                                                                                                                                                                                                                                                                                                                                                                                                                                                                                                                                                                                                                                                                     |
|                               |                                                                                                                                                                                                                                                                                                                                                                                                                                                                                                                                                                                                                                                                                                                                                                          |

SCHOLARONE™  
Manuscripts

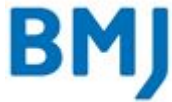

I, the Submitting Author has the right to grant and does grant on behalf of all authors of the Work (as defined in the below author licence), an exclusive licence and/or a non-exclusive licence for contributions from authors who are: i) UK Crown employees; ii) where BMJ has agreed a CC-BY licence shall apply, and/or iii) in accordance with the terms applicable for US Federal Government officers or employees acting as part of their official duties; on a worldwide, perpetual, irrevocable, royalty-free basis to BMJ Publishing Group Ltd ("BMJ") its licensees and where the relevant Journal is co-owned by BMJ to the co-owners of the Journal, to publish the Work in this journal and any other BMJ products and to exploit all rights, as set out in our [licence](#).

The Submitting Author accepts and understands that any supply made under these terms is made by BMJ to the Submitting Author unless you are acting as an employee on behalf of your employer or a postgraduate student of an affiliated institution which is paying any applicable article publishing charge ("APC") for Open Access articles. Where the Submitting Author wishes to make the Work available on an Open Access basis (and intends to pay the relevant APC), the terms of reuse of such Open Access shall be governed by a Creative Commons licence – details of these licences and which [Creative Commons](#) licence will apply to this Work are set out in our licence referred to above.

Other than as permitted in any relevant BMJ Author's Self Archiving Policies, I confirm this Work has not been accepted for publication elsewhere, is not being considered for publication elsewhere and does not duplicate material already published. I confirm all authors consent to publication of this Work and authorise the granting of this licence.

## GENETIC HEALTH PROFESSIONALS RECOMMENDATIONS &amp; RESPONSIBILITIES

**When to break the news and whose responsibility is it? Genetic health professional focus groups on disclosure of BRCA genetic cancer risk**

Alison Luk Young<sup>1,6</sup>, Phyllis N. Butow<sup>1</sup>, Katherine M. Tucker<sup>2,3</sup>, Claire E. Wakefield<sup>5,6</sup>, Emma Healey<sup>4</sup>, Rachel Williams<sup>2,3</sup>

<sup>1</sup>The University of Sydney, Faculty of Science, School of Psychology, Centre for Medical Psychology & Evidence-based Decision-making (CeMPED), Sydney, NSW, Australia;

<sup>2</sup>Prince of Wales Clinical School, Faculty of Medicine, University of New South Wales, Randwick, NSW, Australia;

<sup>3</sup>Prince of Wales Hereditary Cancer Centre, Prince of Wales Hospital, Randwick NSW, Australia;

<sup>4</sup>Illawarra Cancer Care Centre, Wollongong Hospital, Wollongong, NSW, Australia;

<sup>5</sup>School of Women's and Children's Health, University of New South Wales, Sydney, NSW, Australia;

<sup>6</sup>Behavioral Sciences Unit Proudly Supported by the Kids with Cancer Foundation, Kids Cancer Centre, Sydney Children's Hospital, Randwick, Australia.

*Correspondence:* Alison L. Young

Level 6-North, Chris O'Brien Lifehouse (C39Z)

119-143 Missenden Rd, Camperdown NSW 2050

Phone: +61 2 8627 5229

Fax: +61 2 9036 5292

Email: [ayou1666@uni.sydney.edu.au](mailto:ayou1666@uni.sydney.edu.au)

## GENETIC HEALTH PROFESSIONALS RECOMMENDATIONS &amp; RESPONSIBILITIES

**1. ABSTRACT**

**Objectives:** Disclosure of a hereditary condition in the family poses notable challenges for patients, who often seek the assistance of genetic health professionals (GHPs). This study aimed to investigate GHPs' opinions about the ideal time for disclosure to offspring and their responsibility to at-risk relatives.

**Method:** GHPs (N=73) from genetic clinics covering all states of Australia participated in semi-structured focus groups and interviews to explore the topic of disclosure to at-risk offspring, using *BRCA1* and *BRCA2* families as an example. Transcriptions were analysed thematically.

**Results:** GHPs perceived that life-stage, maturity, parents' knowledge, and capacity to disseminate information influenced parent-child disclosure. In general, GHPs recommended early informal conversations with offspring about a family illness. GHPs considered that facilitation of disclosure to relatives using counselling strategies was their responsibility, yet there were limitations to their role (e.g., legal and resource constraints).

Variability exists in the extent to which genetic clinics overcome challenges to disclosure.

**Conclusions:** GHPs' perspective towards the ideal time for disclosure is generally dependent on the patient's age and relative's ability to disclose information. A responsibility towards the patient and their at-risk relative was widely accepted as a role of a GHP but views vary depending on legislative and specialty differences. Greater uniformity is needed in genetic procedural guidelines and the importance of each discipline (e.g., geneticists, oncologists, genetic counsellors, nurses, and psychiatrists/psychologists) in genetic clinics to manage disclosure challenges.

## GENETIC HEALTH PROFESSIONALS RECOMMENDATIONS &amp; RESPONSIBILITIES

**Strengths and limitations of this study**

- This study provides one of the largest cohort of Australian genetic health professionals, with a detailed, in-depth approach to responsibility and confidentiality concerns.
- The findings extend on previous literature by focusing on two major genetic disclosure issues: ideal age of disclosure and the extent to which health professionals are responsible to warn at-risk relatives of their risk.
- The study was limited to focus primarily on the disclosure of BRCA1 or BRCA2 genetic test results.
- A qualitative approach to understanding the challenges of disclosure limited generalisability but highlighted the variability in clinical practices across different legislative contexts and a need for clearer policies and role definitions.

**Keywords:** duty to warn; genetic privacy; genetic testing; genetics; disclosure; ethical issues

## GENETIC HEALTH PROFESSIONALS RECOMMENDATIONS &amp; RESPONSIBILITIES

**2. BACKGROUND**

Identifying a *BRCA1* or *BRCA2* (hereafter *BRCA1/2*) pathogenic variant in the family and informing relatives can be a challenge, since most people do not want to be a ‘bearer of bad news’. Yet, such information can have far-reaching implications for a relative’s decision regarding risk management, lifestyle, and family planning.

Genetic health professionals (GHPs) often work with families trying to navigate parent-child communication about genetic risk, commonly around when, how and what information to give, particularly the ideal age for disclosure (Metcalf, Coad, Plumridge, Gill, & Farndon, 2008).

Factors such as age, gender and the type of genetic condition can influence a child’s understanding of genetic information (Rowland & Metcalf, 2013; Vears, Delany, Massie, & Gillam, 2016). GHPs are also concerned about non-disclosure to children, which does occur, albeit less commonly than to extended relatives (Aktan-Collan et al., 2011; Healey et al., 2017).

Reasons for non-disclosure include: parental guilt, fear of burdening others and a relatives’ inability to cope (Healey et al., 2017). Approximately one third of patients want GHP involvement during family communication (Aktan-Collan et al., 2011; Pentz et al., 2005), especially when families are emotionally and geographically distant (Pentz et al., 2005).

Offspring have also reported a preference for GHPs to disclose a hereditary condition in the family as opposed to parents (Klitzman, Thorne, Williamson, Chung, & Marder, 2007). Yet, the extent of GHP responsibility for ensuring appropriate disclosure is a matter of debate.

Despite the prevalence of studies exploring family communication of genetic information (Gaff et al., 2007), very few studies explore GHPs’ opinions on their responsibility in disclosure. A recent systematic review (Dheensa, Fenwick, Shkedi-Rafid, Crawford, & Lucassen, 2016) found that across eight countries and varying heritable illnesses, GHPs generally felt some sense of

## GENETIC HEALTH PROFESSIONALS RECOMMENDATIONS &amp; RESPONSIBILITIES

responsibility to inform their patients' relatives about their genetic risk. Yet, a range of moral, legal, and practice-related arrangements reportedly made it challenging to act on their perceived responsibility. Of the nine studies in the review, none specifically explored GHPs' responsibility towards patients' relatives. A recent study therefore, aimed to address this gap by conducting focus groups with UK GHPs (Dheensa, Fenwick, & Lucassen, 2017). GHPs in the UK were concerned about the difficulty in distinguishing between genetic and personal information therefore potentially breaching confidentiality through disclosure and more broadly, reported a need for national consensus on following the UK guidelines from the Joint Committee on Medical Genetics. According to these guidelines, GHPs explore family relationships, encourage family communication, and assume that responsibility of disclosure lies with the patient.

Under the legislative guidelines of some countries, when patients do not provide consent for the disclosure of genetic information, GHPs can make contact with at-risk relatives. Across 10 countries, there are eight that accommodate exceptions to confidentiality, with Australia, Canada, Israel and Japan providing explicit circumstances surrounding disclosure without consent (i.e., serious, treatable or preventable) (Wolf et al., 2015).

Unlike the UK, Australia has clearer guidelines on genomic disclosure, but with elusive governance. According to current Australian guidelines from the National Health and Medical Research Council, a GHP can disclose genetic information to an at-risk relative without the patient's consent in specific circumstances. This exemption applies for "incurable" conditions which are "preventable" or include "treatable manifestations" (e.g., depression), in which "specific management" or "treatment" can "lessen or prevent" the threat of disease or distress (National Health and Medical Research Council (2014; p.42). Nevertheless, both Australian and UK guidelines strongly encourage GHPs to take reasonable steps to obtain consent and consider



## GENETIC HEALTH PROFESSIONALS RECOMMENDATIONS &amp; RESPONSIBILITIES

1  
2  
3 the potential consequences of disclosure when consent is not provided (National Health and  
4 Medical Research Council, 2014; Royal College of Physicians Royal College of Pathologists and  
5 British Society for Human Genetics, 2011). However, there is a lack of uniformity across  
6 Australia in how these guidelines are followed and upheld in clinical practice (Otlowski, 2015).  
7 South Australian (SA) genetic services (Suthers, Armstrong, McCormack, & Trott, 2006), for  
8 example, provide family letters to at-risk relatives to inform them of an increased risk, with the  
9 patient's consent but without the recipient's consent, whereas the rest of Australia do not make  
10 provisions for direct contact with relatives. The extent to which Australian GHPs within public  
11 hospitals consider it their role to assist families with disclosure is currently unclear. The purpose  
12 of the current study was to understand the role of genetic health professionals in assisting  
13 families with disclosure of genetic cancer risk. Specifically, two research questions guided the  
14 study: (1) When is the best time to tell offspring about their genetic risk? and, (2) Who is  
15 responsible to inform relatives of their genetic risk?  
16  
17  
18  
19  
20  
21  
22  
23  
24  
25  
26  
27  
28  
29  
30  
31

### 3. METHODS

32  
33  
34  
35 **Patient and Public Involvement statement:** The study involved GHPs but no patients.

36  
37  
38 **Study participants and recruitment:** Eligible GHPs (e.g. geneticist, genetic counsellors,  
39 medical specialists, nurses, surgeons, and psychiatrist/psychologists) who had worked with  
40 *BRCA1/2* families from familial cancer centres within all Australian states. A PhD candidate  
41 with several years' experience in qualitative research (A.L.Y.) presented the study aims to GHPs  
42 during family cancer clinic meetings and/or emailed study details. Interested GHPs were then re-  
43 contacted to arrange a suitable time for participation in a focus group or interview. Recruitment  
44 continued until theoretical saturation was achieved (Namey et al., 2016). Informed consent was  
45 obtained from all participants and the study has the approval of institutional ethics committees.  
46  
47  
48  
49  
50  
51  
52  
53  
54  
55  
56  
57  
58  
59  
60

## GENETIC HEALTH PROFESSIONALS RECOMMENDATIONS &amp; RESPONSIBILITIES

**Procedures:** GHPs completed a questionnaire primarily collecting demographic data, and then took part in a focus group or interview. Focus groups (2-8 individuals) were held in-person or via video-teleconferencing in 2017, during familial cancer clinic meetings or at a time convenient for participants. Semi-structured telephone or face-to-face interviews were completed with participants unable to attend a focus group. Interviews and focus groups ranged in duration from 15-77-minutes, depending greatly on the time-availability of participants.

**Data analysis:** Focus groups and interviews were transcribed verbatim and underwent data-driven analysis by three authors (A.L.Y., P.N.B., R.W.) guided by thematic analysis (Braun & Clarke, 2006) using NVivo 11 computer software to map themes. Consideration was given to whether individuals participating in one method (i.e., focus groups) differed in relation to the experiences discussed in the other method (i.e., interviews). Emphasis was placed on the themes mentioned by the majority of participants and data that raised novel lines of inquiry, reflecting unique sub-themes (e.g., rurality, specialists). Three authors (A.L.Y., P.N.B., R.W.) analysed the first six transcripts by re-reading each transcript, generating codes, and developing overall themes which were then organised into a thematic 'map'. Differences in coding were resolved by consensual discussion. Subsequent transcripts were analysed according to the 'map' resulting in a final set of themes. Focus group or individual interview identification (e.g., FG4 or II4) are provided below.

#### 4. RESULTS

**Sample characteristics:** Of 91 eligible GHPs invited, 73 consented and participated in the study. Demographic characteristics are provided in Table I.

##### 4.1. When is the best time to tell offspring about their genetic risk?

## GENETIC HEALTH PROFESSIONALS RECOMMENDATIONS &amp; RESPONSIBILITIES

1  
2  
3 **4.1.1. Offspring-dependent:** GHPs had different arguments for and against disclosing genetic  
4 status to offspring earlier than 18, at the age of 18 and at the age of 25 onwards. Most GHPs  
5 reported that earlier was better to allow time for the offspring to adjust to, process and research  
6 information about their genetic risk before make decisions about medically mitigating their risk.  
7 Informing children as the conversation arises, in an age-appropriate manner, was commonly  
8 encouraged: “*in an ideal situation it should be a progressive discussion over time*” (FG1). GHPs  
9 argued that if information about genetic risk is withheld, offspring might hear it inadvertently  
10 from relatives and through GHPs during unrelated appointments, placing strain on parent-child  
11 relationships. A few GHPs said that informing children in their mid-teenage years (15-17 years  
12 old) was ideal: “*probably mid-teens, and the reason why [is] to be aware [that] they can be*  
13 *breast aware, not breast alarmed and breast paranoid*” (II15). Planning to inform children at the  
14 age of 18, or “*saving it up as an 18th birthday present*” (FG9), was considered unhelpful and  
15 described as “*dropping the bombshell*” (FG3).

16  
17  
18  
19  
20  
21  
22  
23  
24  
25  
26  
27  
28  
29  
30  
31  
32  
33 In contrast, some GHPs felt that disclosure should be related to **when it could inform**  
34 **testing/screening behaviour or decision-making**, and therefore advocated disclosure at an  
35 older age (>20 years). The recommended breast screening age for *BRCA1/2* carriers is 30 within  
36 Australia (Cancer Institute NSW, 2018). In relation to the patient’s mental health, some GHPs  
37 said that disclosure at a young age can lead to prolonged worry, since the time between  
38 disclosure and screening is longer compared to their older counterparts. However, others  
39 disagreed with this stance stating that older patients can be more anxious if their parents  
40 informed them later due to the immediacy of action needed to mitigate risk. Some GHPs noted  
41 that parents may not be alive when their child reached the recommended age for screening or  
42 testing, and therefore disclosure, and possibly testing, should occur earlier. Subsequent, shifts in  
43  
44  
45  
46  
47  
48  
49  
50  
51  
52  
53  
54  
55  
56  
57  
58  
59  
60

## GENETIC HEALTH PROFESSIONALS RECOMMENDATIONS &amp; RESPONSIBILITIES

1  
2  
3 opinions were discussed, *“it used to be you don’t do anything until you're going to use the*  
4 *information. And my original teaching was that you don't do genetic testing till a month before*  
5 *they're due to start screening...we now know that that isn’t necessarily the best way of offering*  
6 *genetic testing”* (FG1).  
7  
8  
9  
10

11  
12 Other reasons some GHPs advocated disclosure **at an older age** were that young adults are  
13 considered generally more mature and receptive towards genetic information than younger  
14 offspring. Furthermore, the parent-child relationship is likely to change to an adult-adult pattern  
15 of relating by older ages, which can be considered *“on a more even level”* (FG4), allowing the  
16 younger person to be more autonomous in their responses to genetic information and testing  
17 decisions. Disclosure at an older age was considered advantageous to avoid having the child  
18 incorporate the pathogenic variant into their identity. A final justification for withholding  
19 information till adulthood was the potential for inappropriate medical management of young  
20 adults by GHPs in response to anxious, insistent younger adults: *“they can be inappropriately*  
21 *managed if they're aware of this information from a young age...privately...[and] publicly... a*  
22 *breast surgeon will often screen younger women”* (FG7).  
23  
24  
25  
26  
27  
28  
29  
30  
31  
32  
33  
34  
35  
36

37 Some GHPs recommended disclosure **at key points related to genetic risk** when the child was  
38 in any case probably aware of health problems and emotional distress in the family, such as  
39 when a parent was diagnosed and being treated for cancer, or having surgery.  
40  
41  
42  
43

44 Other GHPs said they **did not recommend a time or age for disclosure**, rather they spoke  
45 about taking a case-by-case approach to families, taking into account the unique characteristics  
46 of each individual, life experiences and family dynamics.  
47  
48  
49  
50

51 **4.1.2. Parent-dependant:** Some GHPs emphasised that disclosure should depend on the  
52 parent’s decision about when and how they want to tell their children: *“parents know their child*  
53  
54  
55  
56  
57  
58  
59

## GENETIC HEALTH PROFESSIONALS RECOMMENDATIONS &amp; RESPONSIBILITIES

1  
2  
3 *best of all and they would be in the best position to judge*" (FG22). Parents can use their intuition  
4  
5 to decide on the timing of disclosure and skilfully navigating around stressful events (e.g., cancer  
6  
7 diagnosis or anniversaries). Yet, other GHPs felt that some parents' negative experience with  
8  
9 genetic services could hinder timely and effective disclosure. For example, *"it's often a red flag*  
10  
11 *when you have someone who's not [coped with the testing process] ...if they've got a lot of*  
12  
13 *emotional turmoil going on they kind of can project that and expect that their children will react*  
14  
15 *the same way and perhaps think that their kids can't cope*" (FG4). GHPs also reported that  
16  
17 parents may not understand the seriousness of sharing hereditary cancer information with  
18  
19 families, may have forgotten about their results from a research study, and can potentially still be  
20  
21 trying to process the information for themselves.  
22  
23  
24  
25

#### 26 **4.2. Who is responsible to inform relatives about their genetic risk?**

27  
28 **4.2.1. GHPs are responsible to facilitate and support family communication:** Many GHPs  
29  
30 agreed that they were responsible for facilitating family communication by using a range of  
31  
32 strategies to support probands (i.e., during diagnostic testing) and relatives (i.e., during predictive  
33  
34 testing) to talk to their children and relatives (See Table II for full list of strategies). Factsheets  
35  
36 were referred to most often as a resource to provide probands to assist with disclosure but was  
37  
38 not considered user-friendly or too generic by some. GHPs also admitted to treating families  
39  
40 differently depending on the type of test, *"I'm probably not as active in my making sure the*  
41  
42 *information gets out there with the predictive<sup>1</sup> as I am [with probands who are the first*  
43  
44 *individual with a pathogenic variant to be identified in the family]"* (FG7).  
45  
46  
47  
48

49 GHPs reported that assessment of family communication processes should start early in the  
50  
51 consultation; for geneticists/genetic counsellors this involved pretest counselling, for  
52  
53 nurses/psychologists this was during the first consultation and for oncologists this was at the time  
54  
55  
56  
57  
58  
59  
60

## GENETIC HEALTH PROFESSIONALS RECOMMENDATIONS &amp; RESPONSIBILITIES

1  
2  
3 of talking about genetic testing to cancer patients. Assessment included exploring family  
4 dynamics (e.g., estrangement, lack of communication), emotional responses that could impede  
5 communication (e.g., guilt, fear) and assessing the proband's ability to disclose information to  
6 relatives (e.g., clarify their understanding, coping skills). Building rapport with the patient is an  
7 important "*initial foundation*" (FG20) to help patients with their communication with families.  
8 GHPs advocated for gently preparing probands for the possibility that they could have a positive  
9 test result, and if so, to consider to whom, what and when they would disclose their results.  
10  
11 When parents were finding it difficult to communicate to their children, GHPs offered to have  
12 the offspring join the parent's consultations, or provide subsequent over-the-phone consultations  
13 with the offspring or a separate consultation for the offspring to obtain more information. Family  
14 group consultations were also recommended to facilitate communication and address concerns  
15 with the relevant relatives present. Such consultations allow all members of the family to be  
16 informed simultaneously. Having another family member can lead to greater clarification of  
17 information: "*someone [can] obviously pick something up but they then explained it in a way*  
18 *that helps*" (FG21). However, some GHPs were also concerned about the practicality of  
19 implementing family group consultations in the current public health model. In some cases when  
20 disclosure in families were not occurring, some GHPs were willing to "*take it upon themselves*"  
21 *to see that the adult children involved [were] informed of their risk, "So you're protecting the*  
22 *rights of the child as well"* (FG12).

23  
24  
25  
26  
27  
28  
29  
30  
31  
32  
33  
34  
35  
36  
37  
38  
39  
40  
41  
42  
43  
44  
45  
46  
47 **4.2.2. Different clinics, different responsibility:** The work culture, resources and expectations  
48 within particular genetic services influenced GHPs' views about disclosure to relatives: "*the*  
49 *scope of your role changes with whatever clinical service you are working with*" (FG2). Some  
50 clinical teams placed greater emphasis on disclosure to at-risk relatives. For example, working  
51  
52  
53  
54  
55  
56  
57  
58  
59  
60

## GENETIC HEALTH PROFESSIONALS RECOMMENDATIONS &amp; RESPONSIBILITIES

1  
2  
3 within high-risk clinics provided some opportunities for nurses to explore disclosure, whereas  
4  
5 some genetic counsellors reported, “*working in a busy clinical service in the public system really*  
6  
7 *limits us in terms of our capacity of what we can do*” (II14). Emphasis was placed on young at-  
8  
9 risk relatives’ personal responsibility, with one geneticist saying, “*It's going to become too big*  
10  
11 *for familial cancer centres to be able to hold onto these families and do the follow-up. I think it's*  
12  
13 *going to have to shift out to personal responsibility*” (FG10).

14  
15  
16  
17 **4.2.3. Ultimately it is the families’ responsibility:** Families were considered ultimately  
18  
19 responsible for what they want to do with their own medical information. Confidentiality and  
20  
21 autonomy were upheld by GHPs and if a patient choose to be private, this was respected. Some  
22  
23 felt it was not their role to ensure disclosure beyond providing a family letter.

24  
25  
26 Conversely, others were of the mind that they would like to assist families with communication  
27  
28 but were limited by time constraints and procedural barriers. Some GHPs believed GHPs should  
29  
30 not feel guilty if disclosure did not occur in a family particularly since families do not always tell  
31  
32 GHPs the truth and are unwilling to discuss family dynamics. Some familial issues are beyond a  
33  
34 medical GHP’s capacity (or consultation time) to discuss and requires psychological assistance.  
35  
36 For example, a genetic counsellor said, “*Sometimes I think whatever's going on in their families*  
37  
38 *is beyond what we as genetic counsellors can actually help with, which is unfortunate,*  
39  
40 *but...considering the workload...you can only pour so much of your energy into one family*”  
41  
42 (FG20). Another common limitation GHPs discussed was having no control over what happens  
43  
44 after a consultation, “*you've got no control over what's passed on and what isn't or how it's*  
45  
46 *passed or whether facts and figures [are] mixed up*” (FG10). Moreover, GHPs were also aware  
47  
48 that advocating for disclosure was not beneficial in all cases, “*it's important to be aware of the*  
49  
50 *fact that there could be positives and negatives [in] telling, but also positives and negatives in*  
51  
52  
53  
54  
55  
56  
57  
58  
59  
60

## GENETIC HEALTH PROFESSIONALS RECOMMENDATIONS &amp; RESPONSIBILITIES

1  
2  
3 *not telling*” (II18). Situations in which information is withheld or difficult to navigate include  
4  
5 cases when an at-risk relative has a mental health concern and/or cognitive disability.  
6

## 7 8 **5. DISCUSSION**

9  
10 The age at which disclosure should ideally begin is not a concern of *BRCAl/2* families alone but  
11 is common amongst families with a hereditary condition (Rowland & Metcalfe, 2013). GHPs in  
12 this study recommended optimal timeframes for disclosure of genetic risk to offspring, with the  
13 majority favouring early disclosure tailored to individual circumstances. Hereditary cancer can  
14 be introduced into the family story with a simple explanation about genetics, cancer and the  
15 benefits of testing (Werner-Lin, Merrill, & Brandt, 2018). Similarly, families with Cystic  
16 Fibrosis normalised their condition by informing children that “everyone possesses disease  
17 causing genes” (Cavanagh, Compton, Tluczek, Brown, & Farrell, 2010; p. 206). This method of  
18 dissemination is modelling to children that coping and adjustment to such information is  
19 possible. Having more time to process, talk and ask questions during casual conversations is less  
20 anxiety-provoking than being informed unexpectedly at an age when immediate medical action  
21 is required (Dennis, Howell, Cordeiro, & Tartaglia, 2015).  
22  
23  
24  
25  
26  
27  
28  
29  
30  
31  
32  
33  
34  
35  
36

37 According to Klitzman and colleagues (2007), the reasoning behind GHPs’ perspective about the  
38 ideal age for genetic testing and subsequent disclosure can fall under two categories: 1) the *life*  
39 *stage* or maturity of the child and 2) the *medical time course* and benefit of the information at a  
40 given time. Age-appropriateness was a key feature of early disclosure. According to Piaget’s  
41 theory of cognitive development, children at approximately 11 years old reach the stage of  
42 ‘formal operational thought’, at which hypothesis testing and abstract reasoning develop (Piaget,  
43 1964). In theory, children at this stage can make inferences that if their parent is ill, then they too  
44 could become ill with the same illness (Bibace & Walsh, 1980; Metcalfe, Plumridge, Coad,  
45  
46  
47  
48  
49  
50  
51  
52  
53  
54  
55  
56  
57  
58  
59  
60



## GENETIC HEALTH PROFESSIONALS RECOMMENDATIONS &amp; RESPONSIBILITIES

1  
2  
3 Shanks, & Gill, 2011). Thus, parents will benefit from considering their offspring's cognitive  
4 and emotional capacity before informing them about their risk (Werner-Lin et al., 2018), which  
5 may have different developmental trajectories depending on the temperament of the offspring  
6 (Perlman & Pelphrey, 2010). Parental consideration of disclosure of genetic status with young  
7 adults involves consideration of poignant life-stage changes or communicating at certain  
8 junctures (e.g., impending marriage or pregnancy (Gaff et al., 2007)). Parental capacity to inform  
9 offspring (Cavanagh et al., 2010; Rowland & Metcalfe, 2013) and their own experience or level  
10 of satisfaction with genetic testing may hinder communication (Lieberman et al., 2018),  
11 warranting the facilitation of communication by GHPs (Peshkin, DeMarco, & Tercyak, 2010).  
12 GHP's facilitation of disclosure is generally agreed to be incorporated in their clinical practices  
13 (i.e., Table II), expounding upon previously reported strategies (Dheensa et al., 2017).  
14 Contrastingly, the opinions of some GHPs suggest that facilitation of disclosure is a peripheral  
15 requirement of their practice, other than providing a family letter to be passed from patient-to-  
16 relative. Patient autonomy, confidentiality and/or the law can also contribute to the reluctance to  
17 facilitate disclosure (Dheensa et al., 2016). Follow-up calls/appointments to address disclosure is  
18 considered worthwhile to revisit the topic of disclosure with families, particularly when  
19 legislative changes occur (Derbez, de Pauw, Stoppa-Lyonnet, & de Montgolfier, 2017), yet  
20 resource and time constraints can make this impracticable (Forrest, Delatycki, Curnow, Skene, &  
21 Aitken, 2010).

22 In SA, the genetic services send letters directly to at-risk relatives, with the patient's consent.  
23 Other research has shown benefits from direct contact with at-risk relatives (Schwiter, Rahm,  
24 Williams, & Sturm, 2018). Studies involving a range of illnesses (e.g., *BRCAl/2*, Lynch,  
25 Cowden Syndrome), have shown that when GHPs mediated contact, uptake of testing was  
26  
27  
28  
29  
30  
31  
32  
33  
34  
35  
36  
37  
38  
39  
40  
41  
42  
43  
44  
45  
46  
47  
48  
49  
50  
51  
52  
53  
54  
55  
56  
57  
58  
59  
60

## GENETIC HEALTH PROFESSIONALS RECOMMENDATIONS &amp; RESPONSIBILITIES

1  
2  
3 greater amongst at-risk relatives compared to when contact was patient-mediated (Sermijn et al.,  
4  
5 2016; Suthers et al., 2006). A Western Australian study adopted a cascade screening process  
6  
7 derived from an Australasian model of care for familial hypercholesterolaemia in accordance to  
8  
9 local and national guidelines. Nurse-led initiation of contact with at-risk relatives, despite non-  
10  
11 consent from probands, was effectively completed (Bell et al., 2014). Recently GHPs working in  
12  
13 French genetic clinics are legally permitted to offer a written document informing at-risk  
14  
15 relatives of their risk, yet guidance about to whom this requirement extends to and how GHPs  
16  
17 responsibility will be defined remains elusive (d'Audiffret Van Haecke & de Montgolfier, 2018).  
18  
19  
20

21  
22 In this study, we found that GHPs' opinions regarding their responsibility towards at-risk  
23  
24 relatives differed depending on four factors. First, a GHP's role and opinion were informed by  
25  
26 the attitudes and expertise of the genetic clinic in which they worked, which varied between local  
27  
28 health districts and states. Second, GHPs in each speciality were governed by their own  
29  
30 legislation and ethical guidelines, including the overall framework and ethos in which they  
31  
32 practice, which emphasised family communication to a lesser or greater extent depending on the  
33  
34 profession (e.g., genetic counsellor vs. medical oncologist). Third, GHPs generally reported a  
35  
36 greater need to facilitate communication for probands who are the first in the family to be  
37  
38 identified as a carrier since the burden of sharing information appears greater than those who  
39  
40 have cascade testing, and therefore can also be dependent on whether the patient has cancer or  
41  
42 not. Fourth, state-wide differences in health provision and legislation meant that clinics in SA  
43  
44 can send genetic letters to relatives effectively (Suthers et al., 2006), but GHPs in New South  
45  
46 Wales are still cautious of potential litigation issues despite amendment of privacy principles in  
47  
48 attempt to uniform Australian genetic practices (Otlowski, 2015).  
49  
50  
51  
52  
53  
54  
55  
56  
57  
58  
59  
60

## GENETIC HEALTH PROFESSIONALS RECOMMENDATIONS &amp; RESPONSIBILITIES

1  
2  
3 GHPs working in genetic clinics, many of whom are genetic counsellors, are governed by their  
4  
5  
6  
7  
8  
9  
10  
11  
12  
13  
14  
15  
16  
17  
18  
19  
20  
21  
22  
23  
24  
25  
26  
27  
28  
29  
30  
31  
32  
33  
34  
35  
36  
37  
38  
39  
40  
41  
42  
43  
44  
45  
46  
47  
48  
49  
50  
51  
52  
53  
54  
55  
56  
57  
58  
59  
60

GHPs working in genetic clinics, many of whom are genetic counsellors, are governed by their respective professional guidelines and respective health district legislation. ‘Non-directiveness’ is a term used to describe GHP practices that are patient-centred and uphold the autonomous decisions of the patient (Elwyn, Gray, & Clarke, 2000). Yet, within the context of cancer genetics in which evidence-based surgical treatments exist that effectively mitigate risk, adherence to such principles is questionable (Koch & Nordahl Svendsen, 2005). The Task Force of the National Society of Genetic Counsellors has consequently excluded the term ‘non-directiveness’ in their definition of genetic counselling, emphasizing instead on educating patients about testing implications for themselves and relatives (Resta, 2006). A shared decision-making approach is currently favoured (Forbes Shepherd, Browne, & Warwick, 2016).

Greater clarity is needed on the definition of ‘at-risk relatives’, and the extent to which GHPs are responsible to inform them. With the rise of genomic medicine and the subsequent need to educate the general public of the potential benefits and limitations of such knowledge, the question of who is responsible to inform the public is a wider healthcare concern. Contrary to the opinions of a small minority of GHPs in the current study who predict a shift to personal responsibility when managing at-risk relatives, the European Breast Cancer Council (Rutgers et al., 2019) argues that the healthcare system will need to rise to the challenge and support future families in obtaining high-quality and timely information. It is already evident that without the input of cancer genetic clinics, at-risk relatives are not considering the potential limitations of a proposed test before choosing direct-to-consumer genetic testing (Roberts et al., 2017). The lack of guidance and advice from medical professionals about their genetic risk (Roberts et al., 2017), further reinforces the need for genetic cancer clinics to clarify their responsibility for at-risk relatives.

## GENETIC HEALTH PROFESSIONALS RECOMMENDATIONS &amp; RESPONSIBILITIES

1  
2  
3 **Practice Implications:** A multidisciplinary approach to genomic medicine has been proposed to  
4 be effective in tackling the challenge of disclosure (Derbez et al., 2017; Metcalfe, 2018). GHPs  
5 are currently supporting young at-risk relatives within high-risk clinics in Australia, but can also  
6 potentially allow for ongoing support of families struggling with disclosure difficulties. Funding  
7 regulators are to emphasis fiscal and institutional backing of genetic clinics in order to sustain a  
8 multidisciplinary team and to manage the future role of GHPs in the preventive health of their  
9 patient's relatives.

10  
11  
12 **Limitations:** This study focused primarily on GHPs' view of *BRCAl/2* families' disclosure of  
13 genetic risk. Nevertheless, the topics covered were broad enough to have applicability and  
14 transferability to other adult-onset genetic health conditions (e.g., Familial  
15 Hypercholesterolaemia) in which parents are also faced with the dilemma of disclosure, and in  
16 some cases they have similar consequences and risk-management options available (e.g., Lynch  
17 syndrome). Genetic counsellors (80%) provided the most input into discussions and therefore  
18 their practices were emphasised the most in the results. Further research is required, with larger  
19 samples of geneticists, surgeons, nurses and psychologists in order to elucidate whether their  
20 opinions about their role in disclosure differs.

21  
22  
23 **Conclusion:** This Australian study reports on the ideal age of parent-child disclosure of genetic  
24 risk and GHPs' responsibility towards at-risk relatives. Our findings highlight the need for  
25 clearer policies regarding GHP's responsibility to relatives and to the community in terms of  
26 preventive health, including the need for more staff and fiscal support to sustain disclosure  
27 initiatives (e.g., direct-contact letters).

## GENETIC HEALTH PROFESSIONALS RECOMMENDATIONS &amp; RESPONSIBILITIES

**Footnotes:**

*Predictive testing* is the testing of a relative of after a pathogenic variant has already been identified in the proband.

For peer review only

## GENETIC HEALTH PROFESSIONALS RECOMMENDATIONS &amp; RESPONSIBILITIES

**ACKNOWLEDGEMENTS**

This research received no specific grant from any funding agency in the public, commercial or not-for-profit sectors. A.L.Y. is supported by the School of Psychology Margaret Stewart Fund Scholarship. C.E.W. is supported by a Career Development Fellowship from the National Health and Medical Research Council of Australia (APP1143767). The Behavioural Sciences Unit at the Kids Cancer Centre is proudly supported by the Kids with Cancer Foundation.

**CONFLICT OF INTEREST**

A.L.Y., P.N.B., K.M.T., C.E.W., E.H., and R.W declare that they have no conflict of interest.

**ETHICS APPROVAL**

The project was approved by the University of Sydney Human Research Ethics Committee (HREC 2017/011) which covered the participating hospitals.

**INFORMED CONSENT**

All procedures followed were in accordance the University of Sydney Human Research Ethics Committee) and with the Helsinki Declaration of 1975, as revised in 2000 (5). Signed or electronic consent was obtained from all participants. Informed consent was obtained from all patients for being included in the study.

**AUTHOR'S CONTRUBUTION STATEMENT**

A.L.Y made a substantial contribution to the study design, acquisition of data, analysis, interpretation, revisions for important intellectual content.

## GENETIC HEALTH PROFESSIONALS RECOMMENDATIONS &amp; RESPONSIBILITIES

1  
2  
3 P.N.B. made a substantial contribution to the conception, acquisition of data, analysis  
4  
5 interpretation and drafting the work for important intellectual content.  
6

7  
8 K.M.T. made a substantial contributed to the study design, acquisition of data, analysis  
9  
10 interpretation and drafting the work for important intellectual content.  
11

12  
13 C.E.W. made a substantial contributed to the acquisition of data, analysis, interpretation, and  
14  
15 revisions for important intellectual content.  
16

17  
18 E.H. made a substantial contributed to the acquisition of data, analysis, interpretation, and  
19  
20 revisions for important intellectual content.  
21

22  
23 R.W. made a substantial contributed to the study design, acquisition of data, analysis  
24  
25 interpretation and drafting the work for important intellectual content.  
26  
27  
28  
29  
30  
31  
32  
33  
34  
35  
36  
37  
38  
39  
40  
41  
42  
43  
44  
45  
46  
47  
48  
49  
50  
51  
52  
53  
54  
55  
56  
57  
58  
59  
60

## GENETIC HEALTH PROFESSIONALS RECOMMENDATIONS &amp; RESPONSIBILITIES

## 6. REFERENCES

- Aktan-Collan, K. I., Kääriäinen, H. A., Kolttola, E. M., Pylvänäinen, K., Järvinen, H. J., Haukkala, A. H., & Mecklin, J.-P. (2011). Sharing genetic risk with next generation: Mutation-positive parents' communication with their offspring in Lynch Syndrome. *Familial Cancer*, *10*(1), 43-50. doi:10.1007/s10689-010-9386-x
- Bell, D. A., Pang, J., Burrows, S., Bates, T. R., van Bockxmeer, F. M., Hooper, A. J., . . . Watts, G. F. (2014). Effectiveness of genetic cascade screening for familial hypercholesterolaemia using a centrally co-ordinated clinical service: An Australian experience. *Atherosclerosis*, *239*(1), 93-100. doi:10.1016/j.atherosclerosis.2014.12.036
- Bibace, R., & Walsh, M. E. (1980). Development of children's concepts of illness. *Pediatrics*, *66*(6), 912-917.
- Braun, V., & Clarke, V. (2006). Using thematic analysis in psychology. *Qualitative Research in Psychology*, *3*(2), 77-101. doi:10.1191/1478088706qp063oa
- Cancer Institute NSW. (2018). Risk management for a female BRCA1 mutation carrier. *eviQ Cancer Treatments Online v. 7*. Retrieved from <https://www.eviq.org.au/p/170>
- Cavanagh, L., Compton, C. J., Tluczek, A., Brown, R. L., & Farrell, P. M. (2010). Long-term evaluation of genetic counseling following false-positive newborn screen for Cystic Fibrosis. *Journal of Genetic Counseling*, *19*(2), 199-210. doi:10.1007/s10897-009-9274-4
- d'Audiffret Van Haecke, D., & de Montgolfier, S. (2018). Genetic diseases and information to relatives: Practical and ethical issues for professionals after introduction of a legal framework in France. *European Journal of Human Genetics*, *26*(6), 786-795. doi:10.1038/s41431-018-0103-9
- Dennis, A., Howell, S., Cordeiro, L., & Tartaglia, N. (2015). "How should I tell my child?" Disclosing the diagnosis of sex chromosome aneuploidies. *Journal of Genetic Counseling*, *24*(1), 88-103. doi:10.1007/s10897-014-9741-4
- Derbez, B., de Pauw, A., Stoppa-Lyonnet, D., & de Montgolfier, S. (2017). Supporting disclosure of genetic information to family members: Professional practice and timelines in cancer genetics. *Familial Cancer*, *16*(3), 447-457.
- Dheensa, S., Fenwick, A., & Lucassen, A. (2017). Approaching confidentiality at a familial level in genomic medicine: a focus group study with healthcare professionals. *BMJ Open*, *7*(2). doi:10.1136/bmjopen-2016-012443
- Dheensa, S., Fenwick, A., Shkedi-Rafid, S., Crawford, G., & Lucassen, A. (2016). Health-care professionals' responsibility to patients' relatives in genetic medicine: a systematic review and synthesis of empirical research. *Genetics in Medicine*, *18*(4), 290-301. doi:10.1038/gim.2015.72
- Elwyn, G., Gray, J., & Clarke, A. (2000). Shared decision making and non-directiveness in genetic counselling. *Journal of Medical Genetics*, *37*(2), 135-138. doi:10.1136/jmg.37.2.135
- Forbes Shepherd, R., Browne, T. K., & Warwick, L. (2016). A Relational Approach to Genetic Counseling for Hereditary Breast and Ovarian Cancer. *Journal of Genetic Counseling*. doi:10.1007/s10897-016-0022-2
- Forrest, L. E., Delatycki, M. B., Curnow, L., Skene, L., & Aitken, M. (2010). Genetic health professionals and the communication of genetic information in families: Practice during and after a genetic consultation. *American Journal of Medical Genetics. Part A*, *152A*(6), 1458-1466. doi:10.1002/ajmg.a.33385



## GENETIC HEALTH PROFESSIONALS RECOMMENDATIONS &amp; RESPONSIBILITIES

- 1  
2  
3 Gaff, C. L., Clarke, A. J., Atkinson, P., Sivell, S., Elwyn, G., Iredale, R., . . . Edwards, A. (2007).  
4 Process and outcome in communication of genetic information within families: A  
5 systematic review. *European Journal of Human Genetics*, *15*(10), 999-1011.  
6 doi:10.1038/sj.ejhg.5201883  
7  
8 Healey, E., Taylor, N., Greening, S., Wakefield, C. E., Warwick, L., Williams, R., & Tucker, K.  
9 (2017). Quantifying family dissemination and identifying barriers to communication of  
10 risk information in Australian BRCA families. *Genetics in Medicine*, *19*, 1323.  
11 doi:10.1038/gim.2017.52  
12  
13 Klitzman, R. L., Thorne, D., Williamson, J., Chung, W., & Marder, K. (2007). Disclosures of  
14 Huntington disease risk within families: Patterns of decision-making and implications.  
15 *American Journal of Medical Genetics. Part A*, *143A*(16), 1835-1849.  
16 doi:10.1002/ajmg.a.31864  
17  
18 Koch, L., & Nordahl Svendsen, M. (2005). Providing solutions—defining problems: the  
19 imperative of disease prevention in genetic counselling. *Social Science and Medicine*,  
20 *60*(4), 823-832. doi:10.1016/j.socscimed.2004.06.019  
21  
22 Lieberman, S., Lahad, A., Tomer, A., Koka, S., BenUziyahu, M., Raz, A., & Levy-Lahad, E.  
23 (2018). Familial communication and cascade testing among relatives of BRCA  
24 population screening participants. *Genetics in Medicine*. doi:10.1038/gim.2018.26  
25  
26 Metcalfe, A. (2018). Sharing genetic risk information: Implications for family nurses across the  
27 life span. *Journal of Family Nursing*, *24*(1), 86-105. doi:10.1177/1074840718755401  
28  
29 Metcalfe, A., Coad, J., Plumridge, G. M., Gill, P., & Farndon, P. (2008). Family communication  
30 between children and their parents about inherited genetic conditions: A meta-synthesis  
31 of the research. *European Journal of Human Genetics*, *16*(10), 1193-1200.  
32 doi:10.1038/ejhg.2008.84  
33  
34 Metcalfe, A., Plumridge, G., Coad, J., Shanks, A., & Gill, P. (2011). Parents' and children's  
35 communication about genetic risk: A qualitative study, learning from families'  
36 experiences. *European Journal of Human Genetics*, *19*(6), 640-646.  
37 doi:10.1038/ejhg.2010.258  
38  
39 National Health and Medical Research Council. (2014). Use and disclosure of genetic  
40 information to a patient's genetic relatives under section 95AA of the Privacy Act 1988  
41 (Cth). Guidelines for health practitioners in the private sector. Retrieved from  
42 [www.nhmrc.gov.au/guidelines/publications/g8](http://www.nhmrc.gov.au/guidelines/publications/g8)  
43  
44 Otlowski, M. F. A. (2015). Disclosing genetic information to at-risk relatives: New Australian  
45 privacy principles, but uniformity still elusive. *The Medical journal of Australia*, *202*(6),  
46 335.  
47  
48 Pentz, R. D., Peterson, S. K., Watts, B., Vernon, S. W., Lynch, P. M., Koehly, L. M., & Gritz, E.  
49 R. (2005). Hereditary nonpolyposis colorectal cancer family members' perceptions about  
50 the duty to inform and health professionals' role in disseminating genetic information.  
51 *Genetic Testing*, *9*(3), 261-268. doi:10.1089/gte.2005.9.261  
52  
53 Perlman, S. B., & Pelphrey, K. A. (2010). Regulatory brain development: Balancing emotion and  
54 cognition. *Social Neuroscience*, *5*(5-6), 533-542. doi:10.1080/17470911003683219  
55  
56 Peshkin, B. N., DeMarco, T. A., & Tercyak, K. P. (2010). On the development of a decision  
57 support intervention for mothers undergoing BRCA1/2 cancer genetic testing regarding  
58 communicating test results to their children. *Familial Cancer*, *9*(1), 89-97.  
59 doi:10.1007/s10689-009-9267-3  
60

## GENETIC HEALTH PROFESSIONALS RECOMMENDATIONS &amp; RESPONSIBILITIES

- 1  
2  
3 Piaget, J. (1964). Part I: Cognitive development in children: Piaget development and learning.  
4 *Journal of Research in Science Teaching*, 2, 176-186.
- 5 Resta, R. G. (2006). Defining and redefining the scope and goals of genetic counseling.  
6 *American Journal of Medical Genetics. Part C: Seminars in Medical Genetics*, 142C(4),  
7 269-275. doi:10.1002/ajmg.c.30093
- 8 Roberts, J. S., Gornick, M. C., Carere, D. A., Uhlmann, W. R., Ruffin, M. T., & Green, R. C.  
9 (2017). Direct-to-consumer genetic testing: User motivations, decision making, and  
10 perceived utility of results. *Public Health Genomics*, 20(1), 36-45.  
11 doi:10.1159/000455006
- 12 Rowland, E., & Metcalfe, A. (2013). Communicating inherited genetic risk between parent and  
13 child: A meta-thematic synthesis. *International Journal of Nursing Studies*, 50(6), 870-  
14 880. doi:10.1016/j.ijnurstu.2012.09.002
- 15 Royal College of Physicians Royal College of Pathologists and British Society for Human  
16 Genetics. (2011). Consent and confidentiality in clinical genetic practice: guidance on  
17 genetic testing and sharing genetic information. In *Report of the Joint Committee on*  
18 *Medical Genetics* (2 ed.). London: Royal College of Physicians and Royal College of  
19 Pathologists.
- 20 Rutgers, E., Balmana, J., Beishon, M., Benn, K., Evans, D. G., Mansel, R., . . . Wyld, L. (2019).  
21 European breast cancer council manifesto 2018: Genetic risk prediction testing in breast  
22 cancer. *European Journal of Cancer*, 106, 45-53. doi:10.1016/j.ejca.2018.09.019
- 23 Schwiter, R., Rahm, A. K., Williams, J. L., & Sturm, A. C. (2018). How can we reach at-risk  
24 relatives? Efforts to enhance communication and cascade testing uptake: A mini-review.  
25 *Current Genetic Medicine Reports*, 6(2), 21-27. doi:10.1007/s40142-018-0134-0
- 26 Sermijn, E., Delesie, L., Deschepper, E., Pauwels, I., Bonduelle, M., Teugels, E., & De Greve, J.  
27 (2016). The impact of an interventional counselling procedure in families with a  
28 BRCA1/2 gene mutation: Efficacy and safety. *Familial Cancer*, 15(2), 155-162.  
29 doi:10.1007/s10689-015-9854-4
- 30 Suthers, G. K., Armstrong, J., McCormack, J., & Trott, D. (2006). Letting the family know:  
31 Balancing ethics and effectiveness when notifying relatives about genetic testing for a  
32 familial disorder. *Journal of Medical Genetics*, 43(8), 665-670.  
33 doi:10.1136/jmg.2005.039172
- 34 Vears, D. F., Delany, C., Massie, J., & Gillam, L. (2016). Why do parents want to know their  
35 child's carrier status? A qualitative study. *Journal of Genetic Counseling*, 25(6), 1257-  
36 1266. doi:10.1007/s10897-016-9964-7
- 37 Werner-Lin, A., Merrill, S. L., & Brandt, A. C. (2018). Talking with children about adult-onset  
38 hereditary cancer risk: A developmental approach for parents. *Journal of Genetic*  
39 *Counseling*, 27(3), 533-548. doi:10.1007/s10897-017-0191-7
- 40 Wolf, S. M., Branum, R., Koenig, B. A., Petersen, G. M., Berry, S. A., Beskow, L. M., . . .  
41 Wilfond, B. S. (2015). Returning a research participant's genomic results to relatives:  
42 Analysis and recommendations. *The Journal of Law, Medicine & Ethics*, 43(3), 440-463.  
43 doi:10.1111/jlme.12288
- 44  
45  
46  
47  
48  
49  
50  
51  
52  
53  
54  
55  
56  
57  
58  
59  
60

## GENETIC HEALTH PROFESSIONALS RECOMMENDATIONS &amp; RESPONSIBILITIES

Table I. Sample characteristics

| <b>HEALTH PROFESSIONALS (N=73)</b>                                                                    | <b>No. (range)</b> |
|-------------------------------------------------------------------------------------------------------|--------------------|
| Mean age in years at interview (range)                                                                | 39.81 (23-64)      |
| Average years practicing (range) <sup>†</sup>                                                         | 8.55 (0.50-23)     |
| Average hours each week in direct contact with patients at-high risk of breast/ovarian cancer (range) | 7.53 (0.05-27.50)  |
| <b>Cultural Background<sup>‡</sup></b>                                                                | <b>N (%)</b>       |
| Caucasian                                                                                             | 63 (86.30)         |
| Other                                                                                                 | 9 (12.33)          |
| <b>Marital Status<sup>‡</sup></b>                                                                     |                    |
| Single                                                                                                | 19 (26.03)         |
| Married                                                                                               | 45 (61.64)         |
| De facto / Partnered / Engaged                                                                        | 7 (9.59)           |
| Other                                                                                                 | 1 (1.37)           |
| <b>Employment<sup>‡</sup></b>                                                                         |                    |
| Genetic counsellor                                                                                    | 59 (80.82)         |
| Other (e.g., geneticists, nurses, oncologists, psychologists/psychiatrists)                           | 13 (17.81)         |

<sup>†</sup>Missing demographic data (n=3)

<sup>‡</sup>Missing demographic data (n=1)

## GENETIC HEALTH PROFESSIONALS RECOMMENDATIONS &amp; RESPONSIBILITIES

Table II. Spontaneously reported techniques used by genetic health professionals to facilitate disclosure about a hereditary condition within the family

| TECHNIQUE<br>S OR<br>RESOURCES<br>USED BY<br>GHPS                  | EXAMPLES                                                                                                                                                                                    | ILLUSTRATIVE QUOTE                                                                                                                                               |
|--------------------------------------------------------------------|---------------------------------------------------------------------------------------------------------------------------------------------------------------------------------------------|------------------------------------------------------------------------------------------------------------------------------------------------------------------|
| <b>Educate and correct misconceptions</b>                          | Emphasis the significance of genetic results for the families' healthcare, emphasis their right to know. Assess what information the patient has retained and capable of re-telling others. | <i>"[Patient's come thinking there is] a pre-determined or that a concrete plan has been set in place of what [testing's] going to mean for them"</i> (FG23)     |
| <b>Assess motivation or reasons for disclosure</b>                 | Patients may want their relatives to test to relive themselves of guilt; potential for relatives not to make autonomous decisions                                                           | <i>"I think about what motivates someone to want to tell their family early and what motivates them to withhold information, [it] is really important"</i> (FG3) |
| <b>Hypothetical scenarios &amp; benefit/cost of non-disclosure</b> | Used when patients are reticent or actively non-disclosing to their at-risk relatives                                                                                                       | <i>"...try [to] think about the consequences of not disclosing to [your] daughter"</i> (FG24)                                                                    |
| <b>Frame</b>                                                       | Perceive genetic testing as helpful                                                                                                                                                         | <i>"I often say to people, 'You don't</i>                                                                                                                        |

## GENETIC HEALTH PROFESSIONALS RECOMMENDATIONS &amp; RESPONSIBILITIES

|                                                                            |                                                                                                                                                                                           |                                                                                                                                                                                                                                                                             |
|----------------------------------------------------------------------------|-------------------------------------------------------------------------------------------------------------------------------------------------------------------------------------------|-----------------------------------------------------------------------------------------------------------------------------------------------------------------------------------------------------------------------------------------------------------------------------|
| <b>positively</b>                                                          | and beneficial in leading to risk-reduction of cancer through screening and surgery                                                                                                       | <i>have any choice about what genes you pass on, but you do have a choice to share this information...this is something you can do...[that] you are in control of” (FG4)</i>                                                                                                |
| <b>Normalise</b>                                                           | Reassure that others commonly experience the same emotional responses and barriers. Provide examples of other families’ experiences and the strategies used to overcome similar barriers. | <i>“Everybody brings in a different attitude to this from sort of incredibly pragmatic to incredibly emotional and that must provide the way you deal with that information in your family. There’s no right or wrong it’s just how you’re wired to move forward” (FG4)</i> |
| <b>Identify another relative to disclose information to family members</b> | Used particularly when the proband/patient is unable to disclose to relatives.                                                                                                            | <i>“If they can delegate the task...get your brother who is in touch with all these people or cousin...give the job of disseminating information to somebody else and then that way the patient can concentrate on their own health” (FG1)</i>                              |

## GENETIC HEALTH PROFESSIONALS RECOMMENDATIONS &amp; RESPONSIBILITIES

|                        |                                                                                                                                                                                      |                                                                                                                                                                                                                                                                                                                                                                                                         |
|------------------------|--------------------------------------------------------------------------------------------------------------------------------------------------------------------------------------|---------------------------------------------------------------------------------------------------------------------------------------------------------------------------------------------------------------------------------------------------------------------------------------------------------------------------------------------------------------------------------------------------------|
| <b>Discuss</b>         | Identify ideal timing (e.g., casually,                                                                                                                                               | <i>“Determined whether we know</i>                                                                                                                                                                                                                                                                                                                                                                      |
| <b>“when”,</b>         | avoid anniversaries/major events),                                                                                                                                                   | <i>which side of the family the</i>                                                                                                                                                                                                                                                                                                                                                                     |
| <b>“who”, “how”</b>    | who is at risk and what modality to                                                                                                                                                  | <i>mutation is coming from” (FG12)</i>                                                                                                                                                                                                                                                                                                                                                                  |
| <b>they will</b>       | use to communicate to relatives                                                                                                                                                      |                                                                                                                                                                                                                                                                                                                                                                                                         |
| <b>disclose</b>        | (e.g., face-to-face, letter, online)                                                                                                                                                 |                                                                                                                                                                                                                                                                                                                                                                                                         |
| <b>Role play</b>       | Re-enact the discussion parents would have with their relative, provide the vocabulary, develop a plan, and draw upon how parents’ have disclosed difficult information in the past. | <i>“I often say, ‘You best have...a phrase or something you’re going to say that you feel is age-appropriate for your child’...you want to have a scenario whereby you can communicate something that feels safe for the child that is age-appropriate in terms of the language and you probably don’t want to minimise it or just brush it under the carpet. You want to try and be honest.” (FG4)</i> |
| <b>Family letters</b>  | Helpful when proband/patient is unable to disclose to relatives or fearful of forgetting important information.                                                                      | <i>“The letter help[s] them to share it with their family and that kind of externalises it from them” (FG21)</i>                                                                                                                                                                                                                                                                                        |
| <b>Follow-up phone</b> | Provided: 1) to clarify information provided by proband/patient, 2)                                                                                                                  | <i>“I say, ‘Make a plan...we’ll discuss it over dinner or when you</i>                                                                                                                                                                                                                                                                                                                                  |

## GENETIC HEALTH PROFESSIONALS RECOMMENDATIONS &amp; RESPONSIBILITIES

|                                                              |                                                                                                                                                                                           |                                                                                                                                                                                                                                                                                                                                                                                           |
|--------------------------------------------------------------|-------------------------------------------------------------------------------------------------------------------------------------------------------------------------------------------|-------------------------------------------------------------------------------------------------------------------------------------------------------------------------------------------------------------------------------------------------------------------------------------------------------------------------------------------------------------------------------------------|
| <b>calls/letters/ap<br/>pointments</b>                       | when the relative is reaching an age when medical management is recommended (e.g., screening at 30), 3) when proband/patient needs time to process information (cognitively, emotionally) | <i>are on a family outing and then I check in a few weeks later, 'Did you do that', 'How did it go', 'Is there any way you can think of doing it another way if you didn't get opportunity to discuss it?'"</i><br>(FG2)                                                                                                                                                                  |
| <b>Booklets,<br/>pamphlets,<br/>websites,<br/>factsheets</b> | Provides information, techniques, vocabulary, and examples of other families' experiences.                                                                                                | Younger generation: " <i>Anything online probably would be a great resource for that age group</i> "<br>(FG20)<br><br>Older generation: " <i>...I think if people are handing things to the family, they still want it as more a physical thing like I think from my experience I guess the people maybe that are sharing that information are little bit older themselves...</i> " (FG7) |
| <b>Social media</b>                                          | Helpful if relatives are estranged, live overseas or have minimal contact.                                                                                                                | <i>"They will say 'Oh, actually my relatives are overseas' it's almost as though they're not part of the</i>                                                                                                                                                                                                                                                                              |

## GENETIC HEALTH PROFESSIONALS RECOMMENDATIONS &amp; RESPONSIBILITIES

---

*family anymore, 'They're so  
distant from me'' (FG4)*

---

For peer review only



| Table 1 Consolidated criteria for reporting qualitative studies (COREQ): 32-item checklist                                                                               | Manuscript meets criteria (Yes / No) |
|--------------------------------------------------------------------------------------------------------------------------------------------------------------------------|--------------------------------------|
| No Item Guide questions/description                                                                                                                                      |                                      |
| Domain 1: Research team and reflexivity                                                                                                                                  |                                      |
| Personal Characteristics                                                                                                                                                 |                                      |
| 1. Interviewer/facilitator Which author/s conducted the interview or focus group?                                                                                        | Yes                                  |
| 2. Credentials What were the researcher's credentials? E.g. PhD, MD                                                                                                      | Yes                                  |
| 3. Occupation What was their occupation at the time of the study?                                                                                                        | Yes                                  |
| 4. Gender Was the researcher male or female?                                                                                                                             | Yes                                  |
| 5. Experience and training What experience or training did the researcher have?                                                                                          | Yes                                  |
| Relationship with participants                                                                                                                                           |                                      |
| 6. Relationship established Was a relationship established prior to study commencement?                                                                                  | Yes                                  |
| 7. Participant knowledge of the interviewer                                                                                                                              |                                      |
| What did the participants know about the researcher? e.g. personal goals, reasons for doing the research                                                                 | Yes                                  |
| 8. Interviewer characteristics What characteristics were reported about the interviewer/facilitator? e.g. Bias, assumptions, reasons and interests in the research topic | Yes                                  |
| Domain 2: study design                                                                                                                                                   |                                      |
| Theoretical framework                                                                                                                                                    |                                      |
| 9. Methodological orientation and Theory                                                                                                                                 |                                      |
| What methodological orientation was stated to underpin the study? e.g. grounded theory, discourse analysis, ethnography, phenomenology, content analysis                 | Yes                                  |
| Participant selection                                                                                                                                                    |                                      |
| 10. Sampling How were participants selected? e.g. purposive, convenience, consecutive, snowball                                                                          | Yes                                  |
| 11. Method of approach How were participants approached? e.g. face-to-face, telephone, mail, email                                                                       | Yes                                  |
| 12. Sample size How many participants were in the study?                                                                                                                 | Yes                                  |
| 13. Non-participation How many people refused to participate or dropped out? Reasons?                                                                                    | Yes                                  |
| Setting                                                                                                                                                                  |                                      |
| 14. Setting of data collection Where was the data collected? e.g. home, clinic, workplace                                                                                | Yes                                  |
| 15. Presence of non-participants Was anyone else present besides the participants and researchers?                                                                       | Yes                                  |

|    |                                                            |        |
|----|------------------------------------------------------------|--------|
| 1  |                                                            |        |
| 2  |                                                            |        |
| 3  | 16. Description of sample                                  |        |
| 4  | What are the important                                     |        |
| 5  | characteristics of the sample? e.g. demographic data, date | Yes    |
| 6  | Data collection                                            |        |
| 7  | 17. Interview guide                                        |        |
| 8  | Were questions, prompts, guides                            |        |
| 9  | provided by the authors? Was it pilot tested?              | Yes    |
| 10 | 18. Repeat interviews                                      |        |
| 11 | Were repeat interviews carried out? If                     |        |
| 12 | yes, how many?                                             | NA     |
| 13 | 19. Audio/visual recording                                 |        |
| 14 | Did the research use audio or                              |        |
| 15 | visual recording to collect the data?                      | Yes    |
| 16 | 20. Field notes                                            |        |
| 17 | Were field notes made during and/or after the              |        |
| 18 | interview or focus group?                                  | Yes    |
| 19 | 21. Duration                                               |        |
| 20 | What was the duration of the interviews or                 |        |
| 21 | focus group?                                               | Yes    |
| 22 | 22. Data saturation                                        |        |
| 23 | Was data saturation discussed?                             | Yes    |
| 24 | 23. Transcripts returned                                   |        |
| 25 | Were transcripts returned to                               |        |
| 26 | participants for comment and/or correction?                | NA     |
| 27 | Domain 3: analysis and findingsz                           |        |
| 28 | Data analysis                                              |        |
| 29 | 24. Number of data coders                                  |        |
| 30 | How many data coders coded the                             |        |
| 31 | data?                                                      | Yes; 3 |
| 32 | 25. Description of the coding tree                         |        |
| 33 | Did authors provide a                                      |        |
| 34 | description of the coding tree?                            | Yes    |
| 35 | 26. Derivation of themes                                   |        |
| 36 | Were themes identified in advance                          |        |
| 37 | or derived from the data?                                  | Yes    |
| 38 | 27. Software                                               |        |
| 39 | What software, if applicable, was used to                  |        |
| 40 | manage the data?                                           | Yes    |
| 41 | 28. Participant checking                                   |        |
| 42 | Did participants provide feedback on                       |        |
| 43 | the findings?                                              | NA     |
| 44 | Reporting                                                  |        |
| 45 | 29. Quotations presented                                   |        |
| 46 | Were participant quotations                                |        |
| 47 | presented to illustrate the themes / findings? Was each    |        |
| 48 | quotation identified? e.g. participant number              | Yes    |
| 49 | 30. Data and findings consistent                           |        |
| 50 | Was there consistency                                      |        |
| 51 | between the data presented and the findings?               | Yes    |
| 52 | 31. Clarity of major themes                                |        |
| 53 | Were major themes clearly                                  |        |
| 54 | presented in the findings?                                 | Yes    |
| 55 | 32. Clarity of minor themes                                |        |
| 56 | Is there a description of diverse                          |        |
| 57 | cases or discussion of minor themes?                       | Yes    |
| 58 |                                                            |        |
| 59 |                                                            |        |
| 60 |                                                            |        |

# BMJ Open

## When to break the news and whose responsibility is it? A cross-sectional qualitative study of health professionals' views regarding disclosure of BRCA genetic cancer risk

|                                 |                                                                                                                                                                                                                                                                                                                                                                                                                                                                                                                                                                                                                                                                                                                                                                          |
|---------------------------------|--------------------------------------------------------------------------------------------------------------------------------------------------------------------------------------------------------------------------------------------------------------------------------------------------------------------------------------------------------------------------------------------------------------------------------------------------------------------------------------------------------------------------------------------------------------------------------------------------------------------------------------------------------------------------------------------------------------------------------------------------------------------------|
| Journal:                        | <i>BMJ Open</i>                                                                                                                                                                                                                                                                                                                                                                                                                                                                                                                                                                                                                                                                                                                                                          |
| Manuscript ID                   | bmjopen-2019-033127.R1                                                                                                                                                                                                                                                                                                                                                                                                                                                                                                                                                                                                                                                                                                                                                   |
| Article Type:                   | Original research                                                                                                                                                                                                                                                                                                                                                                                                                                                                                                                                                                                                                                                                                                                                                        |
| Date Submitted by the Author:   | 13-Nov-2019                                                                                                                                                                                                                                                                                                                                                                                                                                                                                                                                                                                                                                                                                                                                                              |
| Complete List of Authors:       | Young, Alison; The University of Sydney, The University of Sydney; Sydney Children's Hospital Randwick, Kids Cancer Centre<br>Butow, Phyllis; The University of Sydney<br>Tucker, Kathy; University of New South Wales, Prince of Wales Clinical School; Prince of Wales Hospital and Community Health Services, Prince of Wales Hereditary Cancer Centre<br>Wakefield, Claire; University of New South Wales, School of Women's and Children's Health; Sydney Children's Hospital Randwick, Kids Cancer Centre<br>Healey, Emma; Wollongong Hospital, Illawarra Cancer Care Centre<br>Williams, Rachel; Prince of Wales Hospital and Community Health Services, Prince of Wales Hereditary Cancer Centre; University of New South Wales, Prince of Wales Clinical School |
| <b>Primary Subject Heading</b>: | Genetics and genomics                                                                                                                                                                                                                                                                                                                                                                                                                                                                                                                                                                                                                                                                                                                                                    |
| Secondary Subject Heading:      | Communication, Ethics, Qualitative research                                                                                                                                                                                                                                                                                                                                                                                                                                                                                                                                                                                                                                                                                                                              |
| Keywords:                       | duty to warn, genetic privacy, genetic testing, ethical issues, disclosure, GENETICS                                                                                                                                                                                                                                                                                                                                                                                                                                                                                                                                                                                                                                                                                     |
|                                 |                                                                                                                                                                                                                                                                                                                                                                                                                                                                                                                                                                                                                                                                                                                                                                          |

SCHOLARONE™  
Manuscripts



I, the Submitting Author has the right to grant and does grant on behalf of all authors of the Work (as defined in the below author licence), an exclusive licence and/or a non-exclusive licence for contributions from authors who are: i) UK Crown employees; ii) where BMJ has agreed a CC-BY licence shall apply, and/or iii) in accordance with the terms applicable for US Federal Government officers or employees acting as part of their official duties; on a worldwide, perpetual, irrevocable, royalty-free basis to BMJ Publishing Group Ltd ("BMJ") its licensees and where the relevant Journal is co-owned by BMJ to the co-owners of the Journal, to publish the Work in this journal and any other BMJ products and to exploit all rights, as set out in our [licence](#).

The Submitting Author accepts and understands that any supply made under these terms is made by BMJ to the Submitting Author unless you are acting as an employee on behalf of your employer or a postgraduate student of an affiliated institution which is paying any applicable article publishing charge ("APC") for Open Access articles. Where the Submitting Author wishes to make the Work available on an Open Access basis (and intends to pay the relevant APC), the terms of reuse of such Open Access shall be governed by a Creative Commons licence – details of these licences and which [Creative Commons](#) licence will apply to this Work are set out in our licence referred to above.

Other than as permitted in any relevant BMJ Author's Self Archiving Policies, I confirm this Work has not been accepted for publication elsewhere, is not being considered for publication elsewhere and does not duplicate material already published. I confirm all authors consent to publication of this Work and authorise the granting of this licence.

## GENETIC HEALTH PROFESSIONALS RECOMMENDATIONS &amp; RESPONSIBILITIES

**When to break the news and whose responsibility is it? A cross-sectional qualitative study of health professionals' views regarding disclosure of BRCA genetic cancer risk**

Alison Luk Young<sup>1,6</sup>, Phyllis N. Butow<sup>1</sup>, Katherine M. Tucker<sup>2,3</sup>, Claire E. Wakefield<sup>5,6</sup>, Emma Healey<sup>4</sup>, Rachel Williams<sup>2,3</sup>

<sup>1</sup>The University of Sydney, Faculty of Science, School of Psychology, Centre for Medical Psychology & Evidence-based Decision-making (CeMPED), Sydney, NSW, Australia;

<sup>2</sup>Prince of Wales Clinical School, Faculty of Medicine, University of New South Wales, Randwick, NSW, Australia;

<sup>3</sup>Prince of Wales Hereditary Cancer Centre, Prince of Wales Hospital, Randwick NSW, Australia;

<sup>4</sup>Illawarra Cancer Care Centre, Wollongong Hospital, Wollongong, NSW, Australia;

<sup>5</sup>School of Women's and Children's Health, University of New South Wales, Sydney, NSW, Australia;

<sup>6</sup>Behavioral Sciences Unit Proudly Supported by the Kids with Cancer Foundation, Kids Cancer Centre, Sydney Children's Hospital, Randwick, Australia.

*Correspondence:* Alison L. Young

Level 6-North, Chris O'Brien Lifehouse (C39Z)

119-143 Missenden Rd, Camperdown NSW 2050

Phone: +61 2 8627 5229

Fax: +61 2 9036 5292

Email: [ayou1666@uni.sydney.edu.au](mailto:ayou1666@uni.sydney.edu.au)

## GENETIC HEALTH PROFESSIONALS RECOMMENDATIONS &amp; RESPONSIBILITIES

**1. ABSTRACT**

**Objectives:** Disclosure of a hereditary condition in the family poses notable challenges for patients who often seek the assistance of genetic health professionals (GHPs). This study aimed to investigate GHPs' opinions about the ideal time for disclosure to offspring and their responsibility to at-risk relatives.

**Design:** Cross-sectional qualitative study.

**Setting:** Genetic familial cancer clinics related to mostly secondary and tertiary care hospitals and centres in urban, regional and rural areas across all states of Australia.

**Participants:** GHPs (N=73) including clinical geneticists, genetic counsellors, medical specialists, nurses, surgeons, and psychiatrist/psychologists who had worked with *BRCA1* and *BRCA2* families for an average of 9 years.

**Results:** Focus groups and interviews were transcribed and analysed thematically. GHPs perceived that life-stage, maturity, parents' knowledge, and capacity to disseminate information influenced parent-offspring disclosure. In general, GHPs recommended early informal conversations with offspring about a family illness. GHPs considered that facilitation of disclosure to relatives using counselling strategies was their responsibility, yet there were limitations to their role (e.g., legal and resource constraints). Variability exists in the extent to which genetic clinics overcome challenges to disclosure.

**Conclusions:** GHPs' views on the ideal time for disclosure of genetic risk is generally dependent on the patient's age and relative's ability to disclose information. A responsibility towards the patient and their at-risk relative was widely accepted as a role of a GHP but views vary depending on legislative and specialty differences. Greater uniformity is needed in genetic procedural guidelines and the role of each discipline (e.g., geneticists, oncologists, genetic

## GENETIC HEALTH PROFESSIONALS RECOMMENDATIONS &amp; RESPONSIBILITIES

counsellors, nurses, and psychiatrists/psychologists) in genetic clinics to manage disclosure challenges.

**Strengths and limitations of this study**

- This study provides one of the largest cohort of Australian genetic health professionals, with a detailed, in-depth approach to responsibility and confidentiality concerns.
- The findings extend on previous literature by focusing on two major genetic disclosure issues: ideal age of disclosure and the extent to which health professionals are responsible to warn at-risk relatives of their genetic cancer risk.
- The study was limited to focus primarily on the disclosure of *BRCA1* or *BRCA2* genetic test results.
- A qualitative approach to understanding the challenges of disclosure
- Highlights the variability in clinical practices across different legislative contexts and a need for clearer policies and role definitions.

**Keywords:** duty to warn; genetic privacy; genetic counselling; genetic testing; Genes, *BRCA1*; Genes, *BRCA2*; disclosure; ethical issues; genetic services

## GENETIC HEALTH PROFESSIONALS RECOMMENDATIONS &amp; RESPONSIBILITIES

**2. BACKGROUND**

Identifying a *BRCA1* or *BRCA2* (hereafter *BRCA1/2*) pathogenic variant in the family and informing relatives can be a challenge, since most people do not want to be a ‘bearer of bad news’. Yet such information can have far-reaching implications for a relative’s decision regarding risk management, lifestyle, and family planning.

Genetic health professionals (GHPs) often work with families trying to navigate parent-offspring communication about genetic risk, commonly around when, how and what information to give, particularly the ideal age for disclosure [1]. Factors such as age, gender and the type of genetic condition can influence offspring’s understanding of genetic information [2, 3]. GHPs are also concerned about non-disclosure to offspring, which does occur, albeit less commonly than to extended relatives [4, 5]. Reasons for non-disclosure include: parental guilt, fear of burdening others and a relatives’ inability to cope [5]. Approximately one third of patients want GHP involvement during family communication [4, 6], especially when families are emotionally and geographically distant [6]. Offspring have also reported a preference for GHPs to disclose a hereditary condition in the family as opposed to parents [7]. Yet the extent to which GHPs are responsible for ensuring appropriate disclosure is a matter of debate. According to Parker and Lucassen [8] considering who owns genetic information is a matter of two viewpoints, namely, as belonging to the individual (personal account model) or belonging to the family (joint-account model). From a personal account standpoint, genetic information is *confidential* unless there is strong reason for disclosure, whereas from a joint-account viewpoint, genetic information is *familial* information, assuming justice to all members, and is communicable unless there is strong reason for non-disclosure. In Australia, the latter is not a widespread viewpoint.



## GENETIC HEALTH PROFESSIONALS RECOMMENDATIONS &amp; RESPONSIBILITIES

1  
2  
3 Despite the prevalence of studies exploring family communication of genetic information [9],  
4 very few studies explore GHPs' opinions on their responsibility to at-risk relatives. A recent  
5 systematic review [10] found that across eight countries and varying heritable illnesses, GHPs  
6 generally felt some sense of responsibility to inform their patients' relatives about their genetic  
7 risk. Yet a range of moral, legal, and practice-related arrangements reportedly made it  
8 challenging to act on their perceived responsibility. Of the nine studies in the review, none  
9 specifically explored GHPs' responsibility towards patients' relatives. A recent study therefore,  
10 aimed to address this gap by conducting focus groups with UK GHPs [11]. GHPs in the UK were  
11 concerned about the difficulty in distinguishing between genetic and personal information  
12 thereafter potentially breaching confidentiality through disclosure and more broadly, reported a  
13 need for national consensus on following the UK guidelines from the Joint Committee on  
14 Medical Genetics. According to these guidelines, GHPs explore family relationships, encourage  
15 family communication, and assume that responsibility of disclosure lies with the patient.  
16  
17 Under the legislative guidelines of some countries, when patients do not provide consent for the  
18 disclosure of genetic information, GHPs can make contact with at-risk relatives.  
19  
20 Both Australian and UK guidelines encourage GHPs to take reasonable steps to obtain consent  
21 and consider the potential consequences of disclosure when consent is not provided [12, 13].  
22  
23 According to current Australian guidelines from the National Health and Medical Research  
24 Council, a GHP can disclose genetic information to an at-risk relative without the patient's  
25 consent in specific circumstances. This exemption applies for "incurable" conditions which are  
26 "preventable" or include "treatable manifestations" (e.g., depression), in which "specific  
27 management" or "treatment" can "lessen or prevent" the threat of disease or distress [12; p.42].  
28  
29 Nevertheless, there is a lack of uniformity across Australia in how these guidelines are followed  
30  
31  
32  
33  
34  
35  
36  
37  
38  
39  
40  
41  
42  
43  
44  
45  
46  
47  
48  
49  
50  
51  
52  
53  
54  
55  
56  
57  
58  
59  
60

## GENETIC HEALTH PROFESSIONALS RECOMMENDATIONS &amp; RESPONSIBILITIES

1  
2  
3 and upheld in clinical practice [14]. South Australian genetic services [15], for example, provide  
4 family letters to at-risk relatives to inform them of an increased risk, with the patient's consent  
5 but without the recipient's consent, whereas the rest of Australia do not make provisions for  
6 direct contact with relatives. The extent to which Australian GHPs within public hospitals  
7 consider it their role to assist families with disclosure is currently unclear. The purpose of the  
8 current study was to understand the role of GHPs<sup>1</sup> in assisting families with disclosure of genetic  
9 cancer risk. Specifically, two research questions guided the study: (1) When is the best time to  
10 tell offspring about their genetic risk? and, (2) Who is responsible to inform relatives of their  
11 genetic risk?  
12  
13  
14  
15  
16  
17  
18  
19  
20  
21  
22  
23

### 24 3. METHODS

25  
26 **Patient and Public Involvement statement:** No patient involved.

27  
28 **Study participants and recruitment:** Eligible GHPs (e.g. clinical geneticist, genetic  
29 counsellors, medical specialists, nurses, surgeons, and psychiatrist/psychologists) who had  
30 worked with *BRCA1/2* families from familial cancer centres within all Australian states. A PhD  
31 candidate with several years' experience in qualitative research (A.L.Y.) presented the study to  
32 potential GHP participants during family cancer clinic meetings and/or emailed study details.  
33 Interested GHPs were then re-contacted to arrange a suitable time for participation in a focus  
34 group or interview. Recruitment continued until theoretical saturation was achieved [16].  
35  
36  
37  
38  
39

40  
41 Informed consent was obtained from all participants and the study was approved by the  
42 University of Sydney Human Research Ethics Committee (HREC 2017/011) which covered the  
43 participating hospitals.  
44

45  
46  
47 **Procedures:** GHPs completed a questionnaire primarily collecting demographic data, and then  
48 took part in a focus group or interview. Focus groups (2-8 individuals) were held in-person or via  
49  
50  
51  
52  
53  
54  
55  
56  
57  
58  
59  
60

## GENETIC HEALTH PROFESSIONALS RECOMMENDATIONS &amp; RESPONSIBILITIES

1  
2  
3 video-teleconferencing in 2017, during familial cancer clinic meetings or at a time convenient for  
4  
5 participants. Semi-structured telephone or face-to-face interviews were completed with  
6  
7 participants unable to attend a focus group. Three qualitative researchers (A.L.Y., P.N.B.,  
8  
9 C.E.W) conducted interviews and focus groups that ranged in duration from 15-77 minutes,  
10  
11 depending on the time-availability of participants.  
12  
13

14 **Data analysis:** Focus groups and interviews were transcribed verbatim and underwent data-  
15  
16 driven analysis by three authors (A.L.Y., P.N.B., R.W.) guided by thematic analysis [17] using  
17  
18 NVivo 11 computer software to map themes. Consideration was given to whether individuals  
19  
20 participating in one method (i.e., focus groups) differed in relation to the experiences discussed  
21  
22 in the other method (i.e., interviews). Emphasis was placed on the themes mentioned by the  
23  
24 majority of participants and data that raised novel lines of inquiry, reflecting unique sub-themes  
25  
26 (e.g., rurality, specialists). Three authors (A.L.Y., P.N.B., R.W.) analysed the first six transcripts  
27  
28 by re-reading each transcript, generating codes, and developing overall themes which were then  
29  
30 organised into a thematic ‘map’. Differences in coding were resolved by consensual discussion.  
31  
32 Subsequent transcripts were analysed according to the ‘map’ resulting in a final set of themes.  
33  
34 Focus group or individual interview identification (e.g., FG4 or II4) are provided below.  
35  
36  
37  
38  
39

#### 40 **4. RESULTS**

41  
42 **Sample characteristics:** Of 91 eligible GHPs invited, 73 consented and participated in the  
43  
44 study. Demographic characteristics are provided in Table I.  
45  
46

#### 47 **4.1. When is the best time to tell offspring about their genetic risk?**

48  
49 **4.1.1. Depending on the offspring:** GHPs had different arguments for and against disclosing  
50  
51 genetic status to offspring earlier than the age of 18, at the age of 18 and at the age of 25  
52  
53 onwards. Most GHPs reported that earlier was better to allow time for the offspring to adjust to,  
54  
55  
56  
57  
58  
59

## GENETIC HEALTH PROFESSIONALS RECOMMENDATIONS &amp; RESPONSIBILITIES

1  
2  
3 process and research information about their genetic risk before making decisions about  
4  
5 medically mitigating their risk. Informing offspring as the conversation arises, in an age-  
6  
7 appropriate manner, was commonly encouraged: “*in an ideal situation it should be a progressive*  
8  
9 *discussion over time*” (FG1). GHPs argued that if information about genetic risk is withheld,  
10  
11 offspring might hear about it inadvertently from relatives and through GHPs during unrelated  
12  
13 appointments, placing strain on the parent-offspring relationship. A few GHPs said that  
14  
15 informing offspring in their mid-teenage years (15-17 years old) was ideal: “*probably mid-teens,*  
16  
17 *and the reason why [is] to be aware [that] they can be breast aware, not breast alarmed and*  
18  
19 *breast paranoid*” (II15). Planning to inform offspring at the age of 18, or “*saving it up as an*  
20  
21 *18th birthday present*” (FG9), was considered unhelpful and described as “*dropping the*  
22  
23 *bombshell*” (FG3).

24  
25  
26  
27  
28 In contrast, some GHPs felt that disclosure should be related to **when it could inform**  
29  
30 **testing/screening behaviour or decision-making**, and therefore advocated disclosure at an  
31  
32 older age (>20 years). The recommended breast screening age for *BRCA1/2* carriers is 30 within  
33  
34 Australia [18]. In relation to the patient’s mental health, some GHPs said that disclosure at a  
35  
36 young age can lead to prolonged worry, since the time between disclosure and screening is  
37  
38 longer compared to their older counterparts. However, others disagreed with this stance stating  
39  
40 that older patients can be more anxious if their parents informed them later due to the immediacy  
41  
42 of action needed to mitigate risk. Some GHPs noted that parents may not be alive when their  
43  
44 offspring reached the recommended age for screening or testing, and therefore disclosure, and  
45  
46 possibly testing, should occur earlier. Subsequent, shifts in opinions were discussed, “*it used to*  
47  
48 *be you don’t do anything until you’re going to use the information. And my original teaching was*  
49  
50  
51  
52  
53  
54  
55  
56  
57  
58  
59  
60

## GENETIC HEALTH PROFESSIONALS RECOMMENDATIONS &amp; RESPONSIBILITIES

1  
2  
3 *that you don't do genetic testing till a month before they're due to start screening...we now know*  
4 *that that isn't necessarily the best way of offering genetic testing” (FG1).*

5  
6  
7  
8 Other reasons some GHPs advocated disclosure **at an older age** were that young adults are  
9  
10 considered generally more mature and receptive towards genetic information than younger  
11  
12 offspring. Furthermore, the parent-offspring relationship is likely to change to an adult-adult  
13  
14 pattern of relating as offspring age, which can be considered “*on a more even level*” (FG4),  
15  
16 allowing the young adult to be autonomous in their responses to genetic information and testing  
17  
18 decisions. Disclosure at an older age was considered advantageous to avoid having offspring  
19  
20 incorporate the pathogenic variant into their identity. A final justification for withholding  
21  
22 information till adulthood was the potential for inappropriate medical management of young  
23  
24 adults by GHPs in response to anxious younger adults insistent to have testing: “*they can be*  
25  
26 *inappropriately managed if they're aware of this information from a young*  
27  
28 *age...privately...[and] publicly... a breast surgeon will often screen younger women” (FG7).*

29  
30  
31  
32  
33 Some GHPs recommended disclosure **at key points related to genetic risk** when offspring was  
34  
35 in any case probably aware of health problems and emotional distress in the family, such as  
36  
37 when a parent was diagnosed and being treated for cancer, or having surgery.

38  
39  
40 Other GHPs said they **did not recommend a time or age for disclosure**, rather they spoke  
41  
42 about taking a case-by-case approach, taking into account the unique characteristics of each  
43  
44 individual, life experiences and family dynamics.

45  
46  
47 **4.1.2. Depending on the parent:** Some GHPs emphasised that disclosure should depend on the  
48  
49 parent’s decision about when and how they want to tell their offspring: “*parents know their child*  
50  
51 *best of all and they would be in the best position to judge” (FG22).* Parents can use their intuition  
52  
53 to decide on the timing of disclosure and skilfully navigating around stressful events (e.g., cancer  
54  
55  
56  
57  
58  
59  
60

## GENETIC HEALTH PROFESSIONALS RECOMMENDATIONS &amp; RESPONSIBILITIES

1  
2  
3 diagnosis or anniversaries). Yet other GHPs felt that some parents' negative experience with  
4 genetic services could hinder timely and effective disclosure. For example, *"it's often a red flag*  
5 *when you have someone who's not [coped with the testing process]...if they've got a lot of*  
6 *emotional turmoil going on they kind of can project that and expect that their children will react*  
7 *the same way and perhaps think that their kids can't cope"* (FG4). GHPs also reported that  
8 parents may not understand the seriousness of sharing hereditary cancer information with  
9 families, may have forgotten about their results from a research study, and can potentially still be  
10 trying to process the information for themselves.

#### 4.2. Who is responsible to inform relatives about their genetic risk?

21  
22 **4.2.1. GHPs are responsible to facilitate and support family communication:** Many GHPs  
23 agreed that they were responsible for facilitating family communication by using a range of  
24 strategies to support probands (i.e., during diagnostic testing) and relatives (i.e., during predictive  
25 testing) to talk to their offspring and relatives (See Table II for full list of strategies). Factsheets  
26 were referred to most often as a resource to provide probands to assist with disclosure but was  
27 considered too generic or not user-friendly by some. GHPs also admitted to treating families  
28 differently depending on the type of test, *"I'm probably not as active in my making sure the*  
29 *information gets out there with the predictive<sup>2</sup> as I am [with probands who are the first*  
30 *individual with a pathogenic variant to be identified in the family]"* (FG7).

31  
32  
33 GHPs reported that assessment of family communication processes should start early in the  
34 consultation; for geneticists/genetic counsellors this involved pre-test counselling, for  
35 nurses/psychologists this was during the first consultation and for oncologists this was at the time  
36 of talking about genetic testing to cancer patients. Assessment included exploring family  
37 dynamics (e.g., estrangement, lack of communication), emotional responses that could impede  
38  
39  
40  
41  
42  
43  
44  
45  
46  
47  
48  
49  
50  
51  
52  
53  
54  
55  
56  
57  
58  
59  
60

## GENETIC HEALTH PROFESSIONALS RECOMMENDATIONS &amp; RESPONSIBILITIES

1  
2  
3 communication (e.g., guilt, fear) and assessing the proband's ability to disclose information to  
4 relatives (e.g., clarify their understanding, coping skills). Building rapport with the patient is an  
5 important "*initial foundation*" (FG20) to help patients with their communication with families.  
6  
7  
8 GHPs advocated for gently preparing probands for the possibility that they could have a positive  
9 test result, and if so, to consider to whom, what and when they would disclose their results.  
10  
11  
12 When parents were finding it difficult to communicate to their offspring, GHPs offered to have  
13 the offspring join the parent's consultations, or provide subsequent over-the-phone consultations  
14 with the offspring and/or a separate consultation for the offspring to obtain more information.  
15  
16  
17 Family group consultations were also recommended to facilitate communication and address  
18 concerns with the relevant relatives present. Such consultations allow all members of the family  
19 to be informed simultaneously. Having another family member can lead to greater clarification  
20 of information: "*someone [can] obviously pick something up but they then explained it in a way*  
21 *that helps*" (FG21). However, some GHPs were also concerned about the practicality of  
22 implementing family group consultations in the current public health model. In some cases when  
23 disclosure in families were not occurring, some GHPs were willing to "*take it upon themselves*"  
24 *to see that the adult children involved [were] informed of their risk, "So you're protecting the*  
25 *rights of the child as well"*" (FG12).

26  
27  
28  
29  
30  
31  
32  
33  
34  
35  
36  
37  
38  
39  
40  
41  
42 **4.2.2. Different clinics, different responsibility:** The work culture, resources and expectations  
43 within particular genetic services influenced GHPs' views about disclosure to relatives: "*the*  
44 *scope of your role changes with whatever clinical service you are working with*" (FG2). Some  
45 clinical teams placed greater emphasis on disclosure to at-risk relatives. For example, working  
46 within high-risk clinics provided some opportunities for nurses to explore disclosure, whereas  
47 some genetic counsellors reported, "*working in a busy clinical service in the public system really*  
48  
49  
50  
51  
52  
53  
54  
55  
56  
57  
58  
59  
60

## GENETIC HEALTH PROFESSIONALS RECOMMENDATIONS &amp; RESPONSIBILITIES

1  
2  
3 *limits us in terms of our capacity of what we can do*” (II14). Emphasis was placed on young at-  
4  
5 risk relatives’ personal responsibility, with one clinical geneticist saying, *“It’s going to become*  
6  
7 *too big for familial cancer centres to be able to hold onto these families and do the follow-up. I*  
8  
9 *think it’s going to have to shift out to personal responsibility”* (FG10).

10  
11  
12 **4.2.3. Ultimately it is the families’ responsibility:** Families were considered ultimately

13 responsible for what they want to do with their own medical information. Confidentiality and  
14  
15 autonomy were upheld by GHPs and if a patient choose to be private, this was respected. Some  
16  
17 felt it was not their role to ensure disclosure beyond providing a family letter.

18  
19 Conversely, others were of the mind that they would like to assist families with communication  
20  
21 but were limited by time constraints and procedural barriers. Some GHPs believed GHPs should  
22  
23 not feel guilty if disclosure did not occur in a family particularly since families do not always tell  
24  
25 GHPs the truth and are unwilling to discuss family dynamics. Some familial issues are beyond a  
26  
27 medical GHP’s capacity (or consultation time) to discuss and requires psychological assistance.

28  
29 For example, a genetic counsellor said, *“Sometimes I think whatever’s going on in their families*  
30  
31 *is beyond what we as genetic counsellors can actually help with, which is unfortunate,*  
32  
33 *but...considering the workload...you can only pour so much of your energy into one family”*

34  
35 (FG20). Another common limitation GHPs discussed was having no control over what happens  
36  
37 after a consultation, *“you’ve got no control over what’s passed on and what isn’t or how it’s*  
38  
39 *passed or whether facts and figures [are] mixed up”* (FG10). Moreover, GHPs were also aware

40  
41 that advocating for disclosure was not beneficial in all cases, *“it’s important to be aware of the*  
42  
43 *fact that there could be positives and negatives [in] telling, but also positives and negatives in*  
44  
45 *not telling”* (II18). Situations in which information is withheld or difficult to navigate include  
46  
47 cases when an at-risk relative has a mental health concern and/or cognitive disability.  
48  
49  
50  
51  
52  
53  
54  
55  
56  
57  
58  
59  
60



## GENETIC HEALTH PROFESSIONALS RECOMMENDATIONS &amp; RESPONSIBILITIES

**5. DISCUSSION**

The age at which disclosure should ideally begin is not a concern of *BRCAl/2* families alone but is common amongst families with a hereditary condition [2]. GHPs in this study recommended optimal timeframes for disclosure of genetic risk to offspring, with the majority favouring early disclosure tailored to individual circumstances. Hereditary cancer can be introduced into the family story with a simple explanation about genetics, cancer and the benefits of testing [19]. An example of such an explanation is that used for families with Cystic Fibrosis, terminology that normalises their condition such as, “everyone possesses disease causing genes” [20; p. 206]. This method of dissemination is modelling to offspring that coping and adjustment to such information is possible. Having more time to process, discuss, and ask questions during casual conversations is less anxiety-provoking than being informed unexpectedly at an age when immediate medical action is required [21].

According to Klitzman and colleagues [7], the reasoning behind GHPs’ perspective about the ideal age for genetic testing and subsequent disclosure can fall under two categories: 1) the *life stage* or maturity of offspring and 2) the *medical time course* and benefit of the information at a given time. Age-appropriateness was a key feature of early disclosure. According to Piaget’s theory of cognitive development, children at approximately 11 years old reach the stage of ‘formal operational thought’, at which hypothesis testing and abstract reasoning develop [22]. In theory, children at this stage can make inferences that if their parent is ill, then they too could become ill with the same illness [23, 24]. Thus, parents are recommended to consider their offspring’s cognitive and emotional capacity before informing them about their risk [19], which may have different developmental trajectories depending on the temperament of the offspring [25]. Parental consideration of disclosure of genetic status with young adults involves

## GENETIC HEALTH PROFESSIONALS RECOMMENDATIONS &amp; RESPONSIBILITIES

1  
2  
3 consideration of poignant life-stage changes or communicating at certain junctures (e.g.,  
4  
5 impending marriage or pregnancy) [9]. Parental capacity to inform offspring [2, 20] and their  
6  
7 own experience or level of satisfaction with genetic testing may hinder communication [26],  
8  
9 warranting the facilitation of communication by GHPs [27].

10  
11 GHP's facilitation of disclosure is generally agreed to be incorporated in their clinical practices  
12  
13 (i.e., Table II), expounding upon previously reported strategies [11]. Contrastingly, the opinions  
14  
15 of some GHPs suggest that facilitation of disclosure is a peripheral requirement of their practice,  
16  
17 other than providing a family letter passed from patient-to-relative. Patient autonomy,  
18  
19 confidentiality and/or the law can also contribute to the reluctance to facilitate disclosure [10].  
20  
21 Follow-up calls/appointments to address disclosure is considered worthwhile to revisit the topic  
22  
23 of disclosure with families, particularly when legislative changes occur [28], yet resource and  
24  
25 time constraints can make this impracticable [29].

26  
27 In South Australia, the genetic services send letters directly to at-risk relatives, with the patient's  
28  
29 consent. Other research has shown benefits from direct contact with at-risk relatives [30]. Studies  
30  
31 involving a range of illnesses (e.g., *BRCA1/2*, Lynch, Cowden Syndrome), have shown that  
32  
33 when GHPs mediated contact, uptake of testing was greater amongst at-risk relatives compared  
34  
35 to when contact was patient-mediated [15, 31]. A Western Australian study adopted a cascade  
36  
37 screening process derived from an Australasian model of care for familial hypercholesterolaemia  
38  
39 in accordance to local and national guidelines. Nurse-led initiation of contact with at-risk  
40  
41 relatives, despite non-consent from probands, allowed for the identification of carriers in first-,  
42  
43 second- and third-degree relatives [32]. Recently GHPs working in French genetic clinics are  
44  
45 legally permitted to offer a written document informing at-risk relatives of their risk, yet  
46  
47 guidance about to whom this requirement extends to and how GHPs responsibility will be  
48  
49  
50  
51  
52  
53  
54  
55  
56  
57  
58  
59  
60

## GENETIC HEALTH PROFESSIONALS RECOMMENDATIONS &amp; RESPONSIBILITIES

1  
2  
3 defined remains elusive [33]. Yet GHPs are still apprehensive about changing their practices  
4  
5 [34], highlighting that a shift towards a 'joint-account model' is not only a matter of legislative  
6  
7 changes but also a matter of shifting viewpoints.  
8  
9

10 In this study, we found that GHPs' opinions regarding their responsibility towards at-risk  
11  
12 relatives differed depending on four factors. First, a GHP's role and opinion were informed by  
13  
14 the attitudes and expertise of the genetic clinic in which they worked, which varied between local  
15  
16 health districts and states. Second, GHPs in each specialty were governed by their own  
17  
18 legislation and ethical guidelines, including the overall framework and ethos in which they  
19  
20 practice, which emphasised family communication to a lesser or greater extent depending on the  
21  
22 profession (e.g., genetic counsellor vs. medical oncologist). Third, GHPs generally reported a  
23  
24 greater need to facilitate communication for probands who are the first in the family to be  
25  
26 identified as a carrier since the burden of sharing information appears greater than those who  
27  
28 have cascade testing, and therefore can also be dependent on whether the patient has cancer or  
29  
30 not. Fourth, state-wide differences in health provision and legislation meant that clinics in South  
31  
32 Australia can send genetic letters to relatives effectively [15], but GHPs in New South Wales are  
33  
34 still cautious of potential litigation issues despite amendment of privacy principles in attempt to  
35  
36 uniform Australian genetic practices [14].  
37  
38  
39  
40  
41

42 GHPs working in genetic clinics, many of whom are genetic counsellors, are governed by their  
43  
44 respective professional guidelines and respective health district legislation. 'Non-directiveness'  
45  
46 is a term used to describe GHP practices that are patient-centred and uphold the autonomous  
47  
48 decisions of the patient [35]. Yet within the context of cancer genetics in which evidence-based  
49  
50 surgical treatments exist that effectively mitigate risk, adherence to such principles is  
51  
52 questionable [36]. The Task Force of the National Society of Genetic Counsellors has  
53  
54  
55  
56  
57  
58  
59  
60

## GENETIC HEALTH PROFESSIONALS RECOMMENDATIONS &amp; RESPONSIBILITIES

1  
2  
3 consequently excluded the term ‘non-directiveness’ in their definition of genetic counselling,  
4  
5 emphasising instead on educating patients about testing implications for themselves and relatives  
6  
7 [37]. A shared decision-making approach is currently favoured [38].  
8  
9

10 With the rise of genomic medicine and the subsequent need to educate the general public of the  
11  
12 potential benefits and limitations of such knowledge, the question of who is responsible to  
13  
14 inform the public is a wider healthcare concern. Contrary to the opinions of a small minority of  
15  
16 GHPs in the current study who predict a shift to personal responsibility when managing at-risk  
17  
18 relatives, the European Breast Cancer Council [39] argues that the healthcare system will need to  
19  
20 rise to the challenge and support future families in obtaining high-quality and timely information.  
21  
22 It is already evident that without the input of cancer genetic clinics, at-risk relatives are not  
23  
24 considering the potential limitations of a proposed test before choosing direct-to-consumer  
25  
26 genetic testing [40]. The lack of guidance and advice from medical professionals about their  
27  
28 genetic risk [40], further reinforces the need for genetic cancer clinics to clarify their  
29  
30 responsibility for at-risk relatives.  
31  
32  
33  
34

35 **Practice Implications:** A multidisciplinary approach to genomic medicine has been proposed to  
36  
37 be effective in tackling the challenge of disclosure [28, 41]. GHPs are currently supporting  
38  
39 young at-risk relatives within high-risk clinics in Australia, but can also potentially allow for  
40  
41 ongoing support of families struggling with disclosure difficulties. It is possible that during the  
42  
43 consent conversation with an index patient GHPs can provide the joint-account viewpoint  
44  
45 towards familial information using the analogy of family members owning a joint bank account  
46  
47 and having equal rights to the funds (information) [8].  
48  
49  
50

51 Funding regulators are to emphasis fiscal and institutional backing of genetic clinics in order to  
52  
53 sustain a multidisciplinary team approach and to manage the future role of GHPs in the  
54  
55  
56  
57  
58  
59  
60

## GENETIC HEALTH PROFESSIONALS RECOMMENDATIONS &amp; RESPONSIBILITIES

1  
2  
3 preventive health of their patient's relatives. GHPs need to be having discussions, amongst  
4  
5 themselves, but ideally nationally with policymakers, legal services and government, to advocate  
6  
7 for more clarity about who owns genetic information – the patient or the family (personal vs  
8  
9 joint-account model) and greater clarity is needed on the definition of 'at-risk relatives', and the  
10  
11 extent to which GHPs are responsible to inform them. The current approaches recommended to  
12  
13 address disclosure of cancer risk in Australia are ad hoc; more guidance and standardisation of  
14  
15 practices is needed by modifying guidelines that are better suited to local regulatory needs.  
16  
17

18  
19 **Limitations:** This study focused primarily on GHPs' view of *BRCA1/2* families' disclosure of  
20  
21 genetic risk. Nevertheless, the topics covered were broad enough to have applicability and  
22  
23 transferability to other adult-onset genetic health conditions (e.g., Familial  
24  
25 Hypercholesterolaemia) in which parents are also faced with the dilemma of disclosure, and in  
26  
27 some cases they have similar consequences and risk-management options available (e.g., Lynch  
28  
29 syndrome). Genetic counsellors (80%) provided the most input into discussions and therefore  
30  
31 their practices were emphasised the most in the results. Further research is required, with larger  
32  
33 samples of geneticists, surgeons, nurses and psychologists in order to elucidate whether their  
34  
35 opinions about their role in disclosure differs.  
36  
37

38  
39 **Conclusion:** This Australian study reports on the ideal age of parent-offspring disclosure of  
40  
41 genetic risk and GHPs' responsibility towards at-risk relatives. Our findings highlight the need  
42  
43 for clearer policies regarding GHP's responsibility to relatives and to the community in terms of  
44  
45 preventive health, including the need for more staff and fiscal support to sustain disclosure  
46  
47 initiatives (e.g., direct-contact letters).  
48  
49  
50  
51  
52  
53  
54  
55  
56  
57  
58  
59  
60

## GENETIC HEALTH PROFESSIONALS RECOMMENDATIONS &amp; RESPONSIBILITIES

**Footnotes:**

<sup>1</sup>*GHPs*, in the context of this study, refers to clinical geneticists and genetic counsellors, and more broadly, health professionals who have worked closely with patients with a *BRCA1* or *BRCA2* genetic risk.

<sup>2</sup>*Predictive testing* is the testing of a relative after a pathogenic variant has already been identified in the proband.

For peer review only

## GENETIC HEALTH PROFESSIONALS RECOMMENDATIONS &amp; RESPONSIBILITIES

**FUNDING**

This research received no specific grant from any funding agency in the public, commercial or not-for-profit sectors. A.L.Y. is supported by the School of Psychology Margaret Stewart Fund Scholarship. C.E.W. is supported by a Career Development Fellowship from the National Health and Medical Research Council of Australia (APP1143767). The Behavioural Sciences Unit at the Kids Cancer Centre is proudly supported by the Kids with Cancer Foundation.

**CONFLICT OF INTEREST**

A.L.Y., P.N.B., K.M.T., C.E.W., E.H., and R.W declare that they have no conflict of interest.

**ETHICS APPROVAL**

The project was approved by the University of Sydney Human Research Ethics Committee (HREC 2017/011) which covered the participating hospitals.

**DATA SHARING STATEMENT:** Data are available upon reasonable request to the authors.

**INFORMED CONSENT**

All procedures followed were in accordance the University of Sydney Human Research Ethics Committee) and with the Helsinki Declaration of 1975, as revised in 2000 (5). Signed or electronic consent was obtained from all participants. Informed consent was obtained from all patients for being included in the study.

## GENETIC HEALTH PROFESSIONALS RECOMMENDATIONS &amp; RESPONSIBILITIES

**AUTHOR'S CONTRUBUTION STATEMENT**

A.L.Y made a substantial contribution to the study design, acquisition of data, analysis, interpretation, revisions for important intellectual content.

P.N.B. made a substantial contribution to the conception, acquisition of data, analysis interpretation and drafting the work for important intellectual content.

K.M.T. made a substantial contributed to the study design, acquisition of data, analysis interpretation and drafting the work for important intellectual content.

C.E.W. made a substantial contributed to the acquisition of data, analysis, interpretation, and revisions for important intellectual content.

E.H. made a substantial contributed to the acquisition of data, analysis, interpretation, and revisions for important intellectual content.

R.W. made a substantial contributed to the study design, acquisition of data, analysis interpretation and drafting the work for important intellectual content.



## GENETIC HEALTH PROFESSIONALS RECOMMENDATIONS &amp; RESPONSIBILITIES

## 6. REFERENCES

1. Metcalfe A, Coad J, Plumridge GM, et al. Family communication between children and their parents about inherited genetic conditions: a meta-synthesis of the research. *Eur J Hum Genet* 2008;16(10):1193-200. doi: 10.1038/ejhg.2008.84
2. Rowland E, Metcalfe A. Communicating inherited genetic risk between parent and child: a meta-thematic synthesis. *Int J Nurs Stud* 2013;50(6):870-80. doi: 10.1016/j.ijnurstu.2012.09.002
3. Vears DF, Delany C, Massie J, et al. Why do parents want to know their child's carrier status? A qualitative study. *J Genet Counsel* 2016;25(6):1257-66. doi: 10.1007/s10897-016-9964-7
4. Aktan-Collan KI, Kääriäinen HA, Koltola EM, et al. Sharing genetic risk with next generation: mutation-positive parents' communication with their offspring in Lynch Syndrome. *Fam Cancer* 2011;10(1):43-50. doi: 10.1007/s10689-010-9386-x
5. Healey E, Taylor N, Greening S, et al. Quantifying family dissemination and identifying barriers to communication of risk information in Australian BRCA families. *Genet Med* 2017;19:1323. doi: 10.1038/gim.2017.52
6. Pentz RD, Peterson SK, Watts B, et al. Hereditary nonpolyposis colorectal cancer family members' perceptions about the duty to inform and health professionals' role in disseminating genetic information. *Genet Test* 2005;9(3):261-68. doi: 10.1089/gte.2005.9.261
7. Klitzman RL, Thorne D, Williamson J, et al. Disclosures of Huntington disease risk within families: patterns of decision-making and implications. *Am J Med Genet A* 2007;143A(16):1835-49. doi: 10.1002/ajmg.a.31864
8. Parker M, Lucassen AM. Genetic information: a joint account? *BMJ (Clinical research ed)* 2004;329(7458):165-67. doi: 10.1136/bmj.329.7458.165
9. Gaff CL, Clarke AJ, Atkinson P, et al. Process and outcome in communication of genetic information within families: a systematic review. *Eur J Hum Genet* 2007;15(10):999-1011. doi: 10.1038/sj.ejhg.5201883 [published Online First: 2007/07/05]
10. Dheensa S, Fenwick A, Shkedi-Rafid S, et al. Health-care professionals' responsibility to patients' relatives in genetic medicine: a systematic review and synthesis of empirical research. *Genet Med* 2016;18(4):290-301. doi: 10.1038/gim.2015.72
11. Dheensa S, Fenwick A, Lucassen A. Approaching confidentiality at a familial level in genomic medicine: a focus group study with healthcare professionals. *BMJ Open* 2017;7(2) doi: 10.1136/bmjopen-2016-012443
12. National Health and Medical Research Council. Use and disclosure of genetic information to a patient's genetic relatives under section 95AA of the Privacy Act 1988 (Cth). Guidelines for health practitioners in the private sector. Canberra: National Health and Medical Research Council; 2014 [Available from: [www.nhmrc.gov.au/guidelines/publications/g8](http://www.nhmrc.gov.au/guidelines/publications/g8) accessed 23 Oct 2018].
13. Royal College of Physicians, Royal College of Pathologists, British Society for Genetic Medicine. Consent and confidentiality in genomic medicine: guidance on the use of genetic and genomic information in the clinic. Report of the Joint Committee on Genomics in Medicine. 3 ed. London: RCP, RCPATH and BSGM, 2019.
14. Otlowski MFA. Disclosing genetic information to at-risk relatives: new Australian privacy principles, but uniformity still elusive. *Med J Aust* 2015;202(6):335.

## GENETIC HEALTH PROFESSIONALS RECOMMENDATIONS &amp; RESPONSIBILITIES

15. Suthers GK, Armstrong J, McCormack J, et al. Letting the family know: balancing ethics and effectiveness when notifying relatives about genetic testing for a familial disorder. *J Med Genet* 2006;43(8):665-70. doi: 10.1136/jmg.2005.039172
16. Namey E, Guest G, McKenna K, et al. Evaluating bang for the buck: a cost-effectiveness comparison between individual interviews and focus groups based on thematic saturation levels. *Am J Eval* 2016;37(3):425-40. doi: 10.1177/1098214016630406
17. Braun V, Clarke V. Using thematic analysis in psychology. *Qual Res Psychol* 2006;3(2):77-101. doi: 10.1191/1478088706qp063oa
18. Cancer Institute NSW. Risk management for a female BRCA1 mutation carrier 2018 [Available from: <https://www.eviq.org.au/p/170> accessed 26 January 2019.
19. Werner-Lin A, Merrill SL, Brandt AC. Talking with children about adult-onset hereditary cancer risk: a developmental approach for parents. *J Genet Counsel* 2018;27(3):533-48. doi: 10.1007/s10897-017-0191-7
20. Cavanagh L, Compton CJ, Tluczek A, et al. Long-term evaluation of genetic counseling following false-positive newborn screen for Cystic Fibrosis. *J Genet Counsel* 2010;19(2):199-210. doi: 10.1007/s10897-009-9274-4
21. Dennis A, Howell S, Cordeiro L, et al. "How should I tell my child?" Disclosing the diagnosis of sex chromosome aneuploidies. *J Genet Counsel* 2015;24(1):88-103. doi: 10.1007/s10897-014-9741-4
22. Piaget J. Part I: Cognitive development in children: Piaget development and learning. *J Res Sci Teach* 1964;2:176-86.
23. Bibace R, Walsh ME. Development of children's concepts of illness. *Pediatrics* 1980;66(6):912-17.
24. Metcalfe A, Plumridge G, Coad J, et al. Parents' and children's communication about genetic risk: a qualitative study, learning from families' experiences. *Eur J Hum Genet* 2011;19(6):640-46. doi: 10.1038/ejhg.2010.258
25. Perlman SB, Pelphrey KA. Regulatory brain development: balancing emotion and cognition. *Soc Neurosci* 2010;5(5-6):533-42. doi: 10.1080/17470911003683219
26. Lieberman S, Lahad A, Tomer A, et al. Familial communication and cascade testing among relatives of BRCA population screening participants. *Genet Med* 2018 doi: 10.1038/gim.2018.26
27. Peshkin BN, DeMarco TA, Tercyak KP. On the development of a decision support intervention for mothers undergoing BRCA1/2 cancer genetic testing regarding communicating test results to their children. *Fam Cancer* 2010;9(1):89-97. doi: 10.1007/s10689-009-9267-3
28. Derbez B, de Pauw A, Stoppa-Lyonnet D, et al. Supporting disclosure of genetic information to family members: professional practice and timelines in cancer genetics. *Fam Cancer* 2017;16(3):447-57.
29. Forrest LE, Delatycki MB, Curnow L, et al. Genetic health professionals and the communication of genetic information in families: practice during and after a genetic consultation. *Am J Med Genet A* 2010;152A(6):1458-66. doi: 10.1002/ajmg.a.33385
30. Schwiter R, Rahm AK, Williams JL, et al. How can we reach at-risk relatives? Efforts to enhance communication and cascade testing uptake: a mini-review. *Curr Genet Med Rep* 2018;6(2):21-27. doi: 10.1007/s40142-018-0134-0
31. Sermijn E, Delesie L, Deschepper E, et al. The impact of an interventional counselling procedure in families with a BRCA1/2 gene mutation: efficacy and safety. *Fam Cancer*

## GENETIC HEALTH PROFESSIONALS RECOMMENDATIONS &amp; RESPONSIBILITIES

- 2016;15(2):155-62. doi: 10.1007/s10689-015-9854-4 [published Online First: 2016/01/11]
32. Bell DA, Pang J, Burrows S, et al. Effectiveness of genetic cascade screening for familial hypercholesterolaemia using a centrally co-ordinated clinical service: an Australian experience. *Atherosclerosis* 2014;239(1):93-100. doi: 10.1016/j.atherosclerosis.2014.12.036
33. d'Audiffret Van Haecke D, de Montgolfier S. Genetic diseases and information to relatives: Practical and ethical issues for professionals after introduction of a legal framework in France. *Eur J Hum Genet* 2018;26(6):786-95. doi: 10.1038/s41431-018-0103-9
34. Derbez B, de Pauw A, Stoppa-Lyonnet D, et al. Familial disclosure by genetic healthcare professionals: a useful but sparingly used legal provision in France. *J Med Ethics* 2019:medethics-2018-105212. doi: 10.1136/medethics-2018-105212
35. Elwyn G, Gray J, Clarke A. Shared decision making and non-directiveness in genetic counselling. *J Med Genet* 2000;37(2):135-38. doi: 10.1136/jmg.37.2.135
36. Koch L, Nordahl Svendsen M. Providing solutions—defining problems: the imperative of disease prevention in genetic counselling. *Soc Sci Med* 2005;60(4):823-32. doi: 10.1016/j.socscimed.2004.06.019
37. Resta RG. Defining and redefining the scope and goals of genetic counseling. *Am J Med Genet C Semin Med Genet* 2006;142C(4):269-75. doi: doi:10.1002/ajmg.c.30093
38. Forbes Shepherd R, Browne TK, Warwick L. A relational approach to genetic counseling for hereditary breast and ovarian cancer. *J Genet Counsel* 2017;26(2):283-99. doi: 10.1007/s10897-016-0022-2
39. Rutgers E, Balmana J, Beishon M, et al. European breast cancer council manifesto 2018: genetic risk prediction testing in breast cancer. *Eur J Cancer* 2019;106:45-53. doi: 10.1016/j.ejca.2018.09.019
40. Roberts JS, Gornick MC, Carere DA, et al. Direct-to-consumer genetic testing: User motivations, decision making, and perceived utility of results. *Public Health Genomics* 2017;20(1):36-45. doi: 10.1159/000455006
41. Metcalfe A. Sharing genetic risk information: implications for family nurses across the life span. *J Fam Nurs* 2018;24(1):86-105. doi: 10.1177/1074840718755401

## GENETIC HEALTH PROFESSIONALS RECOMMENDATIONS &amp; RESPONSIBILITIES

Table I. Sample characteristics

| <b>HEALTH PROFESSIONALS (N=73)</b>                                                                    | <b>No. (range)</b> |
|-------------------------------------------------------------------------------------------------------|--------------------|
| Mean age in years at interview (range)                                                                | 39.81 (23-64)      |
| Average years practicing (range) <sup>†</sup>                                                         | 8.55 (0.50-23)     |
| Average hours each week in direct contact with patients at-high risk of breast/ovarian cancer (range) | 7.53 (0.05-27.50)  |
| <b>Cultural Background<sup>‡</sup></b>                                                                | <b>N (%)</b>       |
| Caucasian                                                                                             | 63 (86.30)         |
| Other                                                                                                 | 9 (12.33)          |
| <b>Marital Status<sup>‡</sup></b>                                                                     |                    |
| Single                                                                                                | 19 (26.03)         |
| Married                                                                                               | 45 (61.64)         |
| De facto / Partnered / Engaged                                                                        | 7 (9.59)           |
| Other                                                                                                 | 1 (1.37)           |
| <b>Employment<sup>‡</sup></b>                                                                         |                    |
| Genetic counsellor                                                                                    | 59 (80.82)         |
| Other (e.g., geneticists, nurses, oncologists, psychologists/psychiatrists)                           | 13 (17.81)         |

<sup>†</sup>Missing demographic data (n=3)

<sup>‡</sup>Missing demographic data (n=1)

## GENETIC HEALTH PROFESSIONALS RECOMMENDATIONS &amp; RESPONSIBILITIES

Table II. Spontaneously reported techniques used by genetic health professionals to facilitate disclosure about a hereditary condition within the family

| TECHNIQUE                                      | EXAMPLES                                                                                                                                                                                                                                                                                                                                                                                                                                                                                                              | ILLUSTRATIVE QUOTE                                                                                                                                                                                                                                                                                                                                                                                                                                                                                                                                  |
|------------------------------------------------|-----------------------------------------------------------------------------------------------------------------------------------------------------------------------------------------------------------------------------------------------------------------------------------------------------------------------------------------------------------------------------------------------------------------------------------------------------------------------------------------------------------------------|-----------------------------------------------------------------------------------------------------------------------------------------------------------------------------------------------------------------------------------------------------------------------------------------------------------------------------------------------------------------------------------------------------------------------------------------------------------------------------------------------------------------------------------------------------|
| <b>S OR<br/>RESOURCES<br/>USED BY<br/>GHPS</b> | <p>Be mindful of an individual's cognitive capacity, emotional maturity and external factors before informing offspring. Use concepts that are easily understood by a particular age group.</p> <ul style="list-style-type: none"> <li>• <b>Children:</b> Use basic concepts; brief explanations; be open about your medical appointments</li> <li>• <b>Adolescence:</b> casual conversations; allow for collaborative decision making</li> <li>• <b>Young Adults:</b> provide details of genetic clinics;</li> </ul> | <p><i>"...every family has certain health issues...this is just one thing that our particular family [has to do, e.g. check-ups, etc.]..." (FG9)</i></p> <p><i>"Just briefly mention 'In our family there is an increased cancer risk, [e.g.] Aunty Stella has decided that she's going to look after herself this way [prophylactic surgery]. But you've seen me I go to my screening every year and that's what I do'. If [parents] go for annual screening...don't just hide that appointment or when the children are at school so they</i></p> |

## GENETIC HEALTH PROFESSIONALS RECOMMENDATIONS &amp; RESPONSIBILITIES

|                                                          |                                                                                                                                                                                                                                                                                                                                                                    |                                                                                                                                                                                                                                                                                                                                                                                                                                                                                                            |
|----------------------------------------------------------|--------------------------------------------------------------------------------------------------------------------------------------------------------------------------------------------------------------------------------------------------------------------------------------------------------------------------------------------------------------------|------------------------------------------------------------------------------------------------------------------------------------------------------------------------------------------------------------------------------------------------------------------------------------------------------------------------------------------------------------------------------------------------------------------------------------------------------------------------------------------------------------|
|                                                          | allow for an autonomous decision making                                                                                                                                                                                                                                                                                                                            | <i>don't know, just be open about the fact 'Oh I'm off for my annual screening today'" (FG9)</i>                                                                                                                                                                                                                                                                                                                                                                                                           |
| <b>Educate and correct misconceptions</b>                | Emphasis the significance of genetic results for the families' healthcare, emphasis their right to know. Assess what information the patient has retained and capable of re-telling others.<br><br>When patients discuss reasons for not wanting to inform relatives gently question for their reasons; such questioning might reveal myths that can be dispelled. | <i>"[Patient's come thinking there is] a pre-determined or that a concrete plan has been set in place of what [testing's] going to mean for them" (FG23)</i><br><br><i>"[Some] people...[with] no breast cancer in the family...still can't talk about it because, 'We might all get breast cancer', even though no one has had breast cancer before... I don't think they can talk about [a] gene mutation or the cancer because I think for many people there are very intimately associated" (FG25)</i> |
| <b>Provide reassurance and encourage patients to ask</b> | At-risk relatives can make contact or attend an appointment at the genetic clinic for information-                                                                                                                                                                                                                                                                 | <i>"I say, 'You don't need to worry about giving them all the ins and outs of what it means and what it means for them, they can speak to</i>                                                                                                                                                                                                                                                                                                                                                              |

## GENETIC HEALTH PROFESSIONALS RECOMMENDATIONS &amp; RESPONSIBILITIES

|                                                                       |                                                                                                                                    |                                                                                                                                                                                                                  |
|-----------------------------------------------------------------------|------------------------------------------------------------------------------------------------------------------------------------|------------------------------------------------------------------------------------------------------------------------------------------------------------------------------------------------------------------|
| <b>their at-risk relatives to make contact with a genetic service</b> | gathering purposes and not only for genetic testing.                                                                               | <i>the local genetics service...so I reassure them that they're not expected to be the expert for the family just to be the source of information about it''</i> (FG9)                                           |
| <b>Assess motivation or reasons for disclosure</b>                    | Patients may want their relatives to test to relieve themselves of guilt; potential for relatives not to make autonomous decisions | <i>"I think about what motivates someone to want to tell their family early and what motivates them to withhold information, [it] is really important"</i> (FG3)                                                 |
| <b>Hypothetical scenarios &amp; benefit/cost of non-disclosure</b>    | Used when patients are reticent or actively non-disclosing to their at-risk relatives                                              | <i>"...try [to] think about the consequences of not disclosing to [your] daughter"</i> (FG24)                                                                                                                    |
| <b>Frame positively</b>                                               | Perceive genetic testing as helpful and beneficial in leading to risk-reduction of cancer through screening and surgery            | <i>"I often say to people, 'You don't have any choice about what genes you pass on, but you do have a choice to share this information...this is something you can do...[that] you are in control of'"</i> (FG4) |

## GENETIC HEALTH PROFESSIONALS RECOMMENDATIONS &amp; RESPONSIBILITIES

|                                                                                      |                                                                                                                                                                                           |                                                                                                                                                                                                                                                                                 |
|--------------------------------------------------------------------------------------|-------------------------------------------------------------------------------------------------------------------------------------------------------------------------------------------|---------------------------------------------------------------------------------------------------------------------------------------------------------------------------------------------------------------------------------------------------------------------------------|
| <b>Normalise</b>                                                                     | Reassure that others commonly experience the same emotional responses and barriers. Provide examples of other families' experiences and the strategies used to overcome similar barriers. | <i>"Everybody brings in a different attitude to this from sort of incredibly pragmatic to incredibly emotional and that must provide the way you deal with that information in your family. There's no right or wrong it's just how you're wired to move forward"</i><br>(FG4)  |
| <b>Alerting at-risk relatives by not disclosing the identity of an index patient</b> | At-risk relatives can be alerted about their cancer risk by informing them that they might be at risk of a condition without disclosing personal medical information                      | <i>"[e.g.,] a woman does not want her family to know her [identity but wants them to know they are at risk, so making a] letter with de-identified information, which we can have them check [and written collaboratively with the patient was] was done routinely."</i> (FG19) |
| <b>Identify another relative to disclose information to</b>                          | Used particularly when the proband/patient is unable to disclose to relatives.                                                                                                            | <i>"If they can delegate the task...get your brother who is in touch with all these people or cousin...give the job of disseminating information to somebody else and then that way the patient can</i>                                                                         |



## GENETIC HEALTH PROFESSIONALS RECOMMENDATIONS &amp; RESPONSIBILITIES

|                                           |                                                                                                                                                                                                                                                                                                                                                                                                                                                                                                                                                                                                                                                                                                              |
|-------------------------------------------|--------------------------------------------------------------------------------------------------------------------------------------------------------------------------------------------------------------------------------------------------------------------------------------------------------------------------------------------------------------------------------------------------------------------------------------------------------------------------------------------------------------------------------------------------------------------------------------------------------------------------------------------------------------------------------------------------------------|
| <b>family</b>                             | <i>concentrate on their own health”</i>                                                                                                                                                                                                                                                                                                                                                                                                                                                                                                                                                                                                                                                                      |
| <b>members</b>                            | (FG1)                                                                                                                                                                                                                                                                                                                                                                                                                                                                                                                                                                                                                                                                                                        |
| <b>Discuss</b><br>“when”,<br>“who”, “how” | Identify ideal timing (e.g., casually, “Determined whether we know<br>avoid anniversaries/major events), <i>which side of the family the</i><br>who is at risk and what modality to <i>mutation is coming from”</i> (FG12)                                                                                                                                                                                                                                                                                                                                                                                                                                                                                   |
| <b>they will</b><br><b>disclose</b>       | use to communicate to relatives<br>(e.g., face-to-face, letter, online)                                                                                                                                                                                                                                                                                                                                                                                                                                                                                                                                                                                                                                      |
| <b>Role play</b>                          | Re-enact the discussion parents <i>“I often say, ‘You best have...a</i><br>would have with their relative, <i>phrase or something you’re going</i><br>provide the vocabulary, develop a <i>to say that you feel is age-</i><br>plan, and draw upon how parents’ <i>appropriate for your child’ ...you</i><br>have disclosed difficult <i>want to have a scenario whereby</i><br>information in the past. <i>you can communicate something</i><br><i>that feels safe for the child that is</i><br><i>age-appropriate in terms of the</i><br><i>language and you probably don’t</i><br><i>want to minimise it or just brush it</i><br><i>under the carpet. You want to try</i><br><i>and be honest.”</i> (FG4) |
| <b>Family letters</b>                     | Helpful when proband/patient is <i>“The letter help[s] them to share it</i><br>unable to disclose to relatives or <i>with their family and that kind of</i><br>fearful of forgetting important <i>externalises it from them”</i> (FG21)<br>information.                                                                                                                                                                                                                                                                                                                                                                                                                                                      |

## GENETIC HEALTH PROFESSIONALS RECOMMENDATIONS &amp; RESPONSIBILITIES

|                                                   |                                                                                                                                                                                                                                                               |                                                                                                                                                                                                                                                                                                                                                                                       |
|---------------------------------------------------|---------------------------------------------------------------------------------------------------------------------------------------------------------------------------------------------------------------------------------------------------------------|---------------------------------------------------------------------------------------------------------------------------------------------------------------------------------------------------------------------------------------------------------------------------------------------------------------------------------------------------------------------------------------|
| <b>Follow-up phone calls/letters/appointments</b> | Provided: 1) to clarify information provided by proband/patient, 2) when the relative is reaching an age when medical management is recommended (e.g., screening at 30), 3) when proband/patient needs time to process information (cognitively, emotionally) | <i>“I say, ‘Make a plan...we’ll discuss it over dinner or when you are on a family outing and then I check in a few weeks later, ‘Did you do that’, ‘How did it go’, ‘Is there any way you can think of doing it another way if you didn’t get opportunity to discuss it?’”</i><br>(FG2)                                                                                              |
| <b>Booklets, pamphlets, websites, factsheets</b>  | Provides information, techniques, vocabulary, and examples of other families’ experiences.                                                                                                                                                                    | Younger generation: <i>“Anything online probably would be a great resource for that age group”</i><br>(FG20)<br><br>Older generation: <i>“...I think if people are handing things to the family, they still want it as more a physical thing like I think from my experience I guess the people maybe that are sharing that information are little bit older themselves...”</i> (FG7) |

## GENETIC HEALTH PROFESSIONALS RECOMMENDATIONS &amp; RESPONSIBILITIES

---

1  
2  
3 **Social media** Helpful if relatives are estranged, *“They will say ‘Oh, actually my*  
4 live overseas or have minimal *relatives are overseas’ it’s almost*  
5 contact. *as though they’re not part of the*  
6 *family anymore, ‘They’re so*  
7 *distant from me’” (FG4)*  
8  
9  
10  
11  
12  
13  
14

---

15  
16  
17  
18  
19  
20  
21  
22  
23  
24  
25  
26  
27  
28  
29  
30  
31  
32  
33  
34  
35  
36  
37  
38  
39  
40  
41  
42  
43  
44  
45  
46  
47  
48  
49  
50  
51  
52  
53  
54  
55  
56  
57  
58  
59  
60

For peer review only

| Table 1 Consolidated criteria for reporting qualitative studies (COREQ): 32-item checklist                                                                               | Manuscript meets criteria (Yes / No) | Page no. |
|--------------------------------------------------------------------------------------------------------------------------------------------------------------------------|--------------------------------------|----------|
| No Item Guide questions/description                                                                                                                                      |                                      |          |
| Domain 1: Research team and reflexivity                                                                                                                                  |                                      |          |
| Personal Characteristics                                                                                                                                                 |                                      |          |
| 1. Interviewer/facilitator Which author/s conducted the interview or focus group?                                                                                        | Yes                                  | 7        |
| 2. Credentials What were the researcher's credentials? E.g. PhD, MD                                                                                                      | Yes                                  | 7        |
| 3. Occupation What was their occupation at the time of the study?                                                                                                        | Yes                                  | 7        |
| 4. Gender Was the researcher male or female?                                                                                                                             | Yes                                  | 1, 7     |
| 5. Experience and training What experience or training did the researcher have?                                                                                          | Yes                                  | 7        |
| Relationship with participants                                                                                                                                           |                                      |          |
| 6. Relationship established Was a relationship established prior to study commencement?                                                                                  | Yes                                  | 7        |
| 7. Participant knowledge of the interviewer                                                                                                                              |                                      |          |
| What did the participants know about the researcher? e.g. personal goals, reasons for doing the research                                                                 | Yes                                  | 7        |
| 8. Interviewer characteristics What characteristics were reported about the interviewer/facilitator? e.g. Bias, assumptions, reasons and interests in the research topic | Yes                                  | 7        |
| Domain 2: study design                                                                                                                                                   |                                      |          |
| Theoretical framework                                                                                                                                                    |                                      |          |
| 9. Methodological orientation and Theory                                                                                                                                 |                                      |          |
| What methodological orientation was stated to underpin the study? e.g. grounded theory, discourse analysis, ethnography, phenomenology, content analysis                 | Yes                                  | 8        |
| Participant selection                                                                                                                                                    |                                      |          |
| 10. Sampling How were participants selected? e.g. purposive, convenience, consecutive, snowball                                                                          | Yes                                  | 7        |
| 11. Method of approach How were participants approached? e.g. face-to-face, telephone, mail, email                                                                       | Yes                                  | 7        |
| 12. Sample size How many participants were in the study?                                                                                                                 | Yes                                  | 8        |
| 13. Non-participation How many people refused to participate or dropped out? Reasons?                                                                                    | Yes                                  | 8        |
| Setting                                                                                                                                                                  |                                      |          |
| 14. Setting of data collection Where was the data collected? e.g. home, clinic, workplace                                                                                | Yes                                  | 7        |
| 15. Presence of non-participants Was anyone else present besides the participants and researchers?                                                                       | Yes                                  | 7        |

|    |                                                                                                                                   |                                                         |           |
|----|-----------------------------------------------------------------------------------------------------------------------------------|---------------------------------------------------------|-----------|
| 1  |                                                                                                                                   |                                                         |           |
| 2  |                                                                                                                                   |                                                         |           |
| 3  | 16. Description of sample                                                                                                         |                                                         |           |
| 4  | What are the important characteristics of the sample? e.g. demographic data, date                                                 | Yes                                                     | 8         |
| 5  | Data collection                                                                                                                   |                                                         |           |
| 6  |                                                                                                                                   |                                                         |           |
| 7  |                                                                                                                                   |                                                         |           |
| 8  | 17. Interview guide                                                                                                               |                                                         |           |
| 9  | Were questions, prompts, guides provided by the authors? Was it pilot tested?                                                     | No included in this paper specifically but is elsewhere |           |
| 10 | 18. Repeat interviews                                                                                                             |                                                         |           |
| 11 | Were repeat interviews carried out? If yes, how many?                                                                             | NA                                                      |           |
| 12 |                                                                                                                                   |                                                         |           |
| 13 | 19. Audio/visual recording                                                                                                        |                                                         |           |
| 14 | Did the research use audio or visual recording to collect the data?                                                               | Yes                                                     | 8         |
| 15 | 20. Field notes                                                                                                                   |                                                         |           |
| 16 | Were field notes made during and/or after the interview or focus group?                                                           | Yes                                                     | 8         |
| 17 | 21. Duration                                                                                                                      |                                                         |           |
| 18 | What was the duration of the interviews or focus group?                                                                           | Yes                                                     | 7         |
| 19 |                                                                                                                                   |                                                         |           |
| 20 | 22. Data saturation                                                                                                               |                                                         |           |
| 21 | Was data saturation discussed?                                                                                                    | Yes                                                     | 7         |
| 22 | 23. Transcripts returned                                                                                                          |                                                         |           |
| 23 | Were transcripts returned to participants for comment and/or correction?                                                          | NA                                                      |           |
| 24 | Domain 3: analysis and findingsz                                                                                                  |                                                         |           |
| 25 | Data analysis                                                                                                                     |                                                         |           |
| 26 | 24. Number of data coders                                                                                                         |                                                         |           |
| 27 | How many data coders coded the data?                                                                                              | Yes; 3                                                  | 8         |
| 28 | 25. Description of the coding tree                                                                                                |                                                         |           |
| 29 | Did authors provide a description of the coding tree?                                                                             | Yes                                                     | 8         |
| 30 | 26. Derivation of themes                                                                                                          |                                                         |           |
| 31 | Were themes identified in advance or derived from the data?                                                                       | Yes                                                     | 8         |
| 32 | 27. Software                                                                                                                      |                                                         |           |
| 33 | What software, if applicable, was used to manage the data?                                                                        | Yes                                                     | 8         |
| 34 | 28. Participant checking                                                                                                          |                                                         |           |
| 35 | Did participants provide feedback on the findings?                                                                                | NA                                                      |           |
| 36 | Reporting                                                                                                                         |                                                         |           |
| 37 |                                                                                                                                   |                                                         |           |
| 38 |                                                                                                                                   |                                                         |           |
| 39 |                                                                                                                                   |                                                         |           |
| 40 | 29. Quotations presented                                                                                                          |                                                         |           |
| 41 | Were participant quotations presented to illustrate the themes / findings? Was each quotation identified? e.g. participant number | Yes                                                     | Page 8-13 |
| 42 |                                                                                                                                   |                                                         |           |
| 43 |                                                                                                                                   |                                                         |           |
| 44 |                                                                                                                                   |                                                         |           |
| 45 | 30. Data and findings consistent                                                                                                  |                                                         |           |
| 46 | Was there consistency between the data presented and the findings?                                                                | Yes                                                     | Page 8-13 |
| 47 | 31. Clarity of major themes                                                                                                       |                                                         |           |
| 48 | Were major themes clearly presented in the findings?                                                                              | Yes                                                     | Page 8-17 |
| 49 | 32. Clarity of minor themes                                                                                                       |                                                         |           |
| 50 | Is there a description of diverse cases or discussion of minor themes?                                                            | Yes                                                     | Page 8-17 |
| 51 |                                                                                                                                   |                                                         |           |
| 52 |                                                                                                                                   |                                                         |           |
| 53 |                                                                                                                                   |                                                         |           |
| 54 |                                                                                                                                   |                                                         |           |
| 55 |                                                                                                                                   |                                                         |           |
| 56 |                                                                                                                                   |                                                         |           |
| 57 |                                                                                                                                   |                                                         |           |
| 58 |                                                                                                                                   |                                                         |           |
| 59 |                                                                                                                                   |                                                         |           |
| 60 |                                                                                                                                   |                                                         |           |
